# Supplementary material
Source: publisher site journal article supplement (https://www.dovepress.com/article/264545)
Supplement: Supplementary file 1 [file get_supplementary_file.php]

## Supplementary Methods

### Human Lung squamous cell carcinoma tumor specimens.

The study protocol and informed consent from all studies in this study were approved by the Ethics Committee of the Sichuan Provincial People's Hospital of University of Electronic Science and Technology, China. Informed consent in writing was obtained from each patient and the study protocol conformed to the ethical guidelines of the 1975 Declaration of Helsinki as reflected in a prior approval by the Ethics Committee of the Sichuan Provincial People's Hospital of University of Electronic Science and Technology, China. The diagnosis of LUSC was made by pathologists in the above hospitals by hematoxylin and eosin (H&E) staining according to histology plus the immunohistochemistry for chromogranin A and synaptophysin. Of the 58 patients, 58 formalin fixed paraffin embedded (FFPE) tumor samples had matched germline specimen (n=58). Whole-exome sequencing (WES) was performed on 58 LUSC FFPE tumor samples and matched germline specimen.

### Whole-exome sequencing and Data processing.

DNA was extracted from each FFPE specimen (n=58) and matched germline specimen (n=58) using the Genra Puregene DNA extraction kit (Qiagen) following the protocol of the manufacturer. All sequence data was QCd for read counts, quality values, GC-content, and all other relevant parameters with FastQC (v0.10.1). The raw paired sequencing reads of human samples acquired from WES were aligned to the respective human (hg38). The alignment was performed with the BWA aligner<sup>1</sup> (version 0.6.1-r104). Concordant read-pairs were identified as potential PCR duplicates and were subsequently masked in the alignment file. Additionally, an estimation of human DNA library contamination was implemented to enhance sensitivity and specificity of mutation calling. SAMtools mpileup (0.1.19)<sup>2</sup> was used to locate non-reference positions in tumor and germline samples. After removal of terminal adaptor sequences and low-quality data, reads were mapped to the reference human genome (hg38) and aligned using BWA (version 0.6.1-r104). MuTect2 (3.4-46-gbc02625)<sup>3</sup> was employed to call somatic small insertions and deletions (InDels) and single nucleotide variants (SNVs).

---

<sup>1</sup> Li,H.&Durbin,R.FastandaccurateshortreadalignmentwithBurrows-Wheeler transform. *Bioinformatics* 25, 1754 – 1760 (2009).

<sup>2</sup> Li H, Handsaker B, Wysoker A, et al. The Sequence Alignment/Map format and SAMtools. *Bioinformatics* 2009;25:2078-9.

<sup>3</sup> Cibulskis, K. et al. Sensitive detection of somatic point mutations in impure and heterogeneous cancer samples. *Nat. Biotechnol.* 31, 213 – 219 (2013).

Table S1. The information of fifteen GDSC-LUSC cell lines.

| Cell_line   | TCGA_classification | IC50      | IGF2R | CCLC_name      | Cell_line_aliases | Gender | Source | Oncomap | Hybrid_Capture_Sequencing |
|-------------|---------------------|-----------|-------|----------------|-------------------|--------|--------|---------|---------------------------|
| EBC-1       | LUSC                | 9.006367  | WT    | EBC1_LUNG      |                   | M      | RIKEN  | yes     | yes                       |
| EPLC-272H   | LUSC                | 2.076526  | MT    | EPLC272H_LUNG  |                   | M      | DSMZ   | yes     | yes                       |
| HARA        | LUSC                | 7.698648  | MT    | HARA_LUNG      |                   | M      | HSRRB  | yes     | yes                       |
| HCC-15      | LUSC                | 15.736582 | WT    | HCC15_LUNG     |                   | M      | DSMZ   | yes     | yes                       |
| KNS-62      | LUSC                | 3.127851  | MT    | KNS62_LUNG     |                   | M      | HSRRB  | yes     | yes                       |
| LC-1 sq     | LUSC                | 4.637701  | WT    | LC1SQSF_LUNG   | LC-1 sq           | M      | RIKEN  | yes     | yes                       |
| LK-2        | LUSC                | 3.109972  | MT    | LK2_LUNG       |                   | M      | RIKEN  | yes     | yes                       |
| LOU-NH91    | LUSC                | 10.295492 | WT    | LOUNH91_LUNG   |                   | F      | DSMZ   | yes     | yes                       |
| NCI-H1869   | LUSC                | 12.263493 | WT    | NCIH1869_LUNG  | H1869             | M      | ATCC   | yes     | yes                       |
| NCI-H2170   | LUSC                | 34.628427 | WT    | NCIH2170_LUNG  | H2170             | M      | ATCC   | yes     | yes                       |
| NCI-H226    | LUSC                | 13.249541 | WT    | NCIH226_LUNG   | H226              | M      | ATCC   | yes     | yes                       |
| NCI-H520    | LUSC                | 34.725225 | WT    | NCIH520_LUNG   | H520              | M      | ATCC   | yes     | yes                       |
| RERF-LC-Sq1 | LUSC                | 16.844052 | WT    | RERFLCSQ1_LUNG |                   | F      | HSRRB  | yes     | yes                       |
| SK-MES-1    | LUSC                | 8.156505  | WT    | SKMES1_LUNG    |                   | M      | ATCC   | yes     | yes                       |
| SW 900      | LUSC                | 1.958399  | WT    | SW900_LUNG     |                   | M      | ATCC   | yes     | yes                       |

Table S2. The mutations associated with cisplatin response.

| gene     | Pval        | Wildtype (Mean: Cisplatin IC50) | Mutation (Mean: Cisplatin IC50) | Mutation vs Wildtype |
|----------|-------------|---------------------------------|---------------------------------|----------------------|
| PDE3A    | 0.004395604 | 14.19749033                     | 2.381632333                     | Cisplatin Sensitive  |
| VPS13B   | 0.017582418 | 9.184076833                     | 22.43528633                     | Cisplatin Resistant  |
| AFF3     | 0.019047619 | 8.320086846                     | 34.676826                       | Cisplatin Resistant  |
| CYP4F2   | 0.019047619 | 13.34460431                     | 2.0174625                       | Cisplatin Sensitive  |
| DARS     | 0.019047619 | 8.320086846                     | 34.676826                       | Cisplatin Resistant  |
| DSG1     | 0.019047619 | 8.320086846                     | 34.676826                       | Cisplatin Resistant  |
| KIAA1731 | 0.019047619 | 13.34460431                     | 2.0174625                       | Cisplatin Sensitive  |
| MYH13    | 0.019047619 | 13.34460431                     | 2.0174625                       | Cisplatin Sensitive  |
| OR4C6    | 0.019047619 | 8.320086846                     | 34.676826                       | Cisplatin Resistant  |
| OXR1     | 0.019047619 | 13.34460431                     | 2.0174625                       | Cisplatin Sensitive  |
| PLXND1   | 0.019047619 | 13.34460431                     | 2.0174625                       | Cisplatin Sensitive  |
| ZNF423   | 0.019047619 | 13.34460431                     | 2.0174625                       | Cisplatin Sensitive  |
| DCC      | 0.026373626 | 7.583470909                     | 23.52415025                     | Cisplatin Resistant  |
| IGF2R    | 0.026373626 | 14.68198036                     | 4.00324925                      | Cisplatin Sensitive  |
| SLFN13   | 0.030769231 | 13.98405908                     | 3.235357333                     | Cisplatin Sensitive  |
| ZFYVE9   | 0.030769231 | 14.100036                       | 2.771449667                     | Cisplatin Sensitive  |
| ATP10B   | 0.038095238 | 13.26510846                     | 2.5341855                       | Cisplatin Sensitive  |
| CUBN     | 0.038095238 | 13.26510846                     | 2.5341855                       | Cisplatin Sensitive  |
| DNAH5    | 0.038095238 | 13.26510846                     | 2.5341855                       | Cisplatin Sensitive  |
| IRAK3    | 0.038095238 | 9.688115692                     | 25.7846385                      | Cisplatin            |

|         |             |             |            |                                     |
|---------|-------------|-------------|------------|-------------------------------------|
| POLR3A  | 0.038095238 | 9.688115692 | 25.7846385 | Resistant<br>Cisplatin<br>Resistant |
| RALYL   | 0.038095238 | 13.26510846 | 2.5341855  | Cisplatin<br>Sensitive              |
| SLC16A6 | 0.038095238 | 13.26510846 | 2.5341855  | Cisplatin<br>Sensitive              |
| SORCS1  | 0.038095238 | 13.26510846 | 2.5341855  | Cisplatin<br>Sensitive              |
| SYCP1   | 0.038095238 | 13.26510846 | 2.5341855  | Cisplatin<br>Sensitive              |
| ZNF536  | 0.038095238 | 13.26510846 | 2.5341855  | Cisplatin<br>Sensitive              |
| KLHL4   | 0.03956044  | 14.640357   | 4.1177135  | Cisplatin<br>Sensitive              |
| MLL2    | 0.03996004  | 14.9995601  | 5.503836   | Cisplatin<br>Sensitive              |
| LRRIQ3  | 0.048351648 | 13.72898017 | 4.255673   | Cisplatin<br>Sensitive              |
| SG269   | 0.048351648 | 13.98256917 | 3.241317   | Cisplatin<br>Sensitive              |

---

| Hugo_Sym      | Entrez_Ge | Center | NCBI_Build | Chromosome | Start_Posit | End_Positi | Strand | Variant_Cl  |
|---------------|-----------|--------|------------|------------|-------------|------------|--------|-------------|
| TTN           | 7273      | UNKNO  | hg38       | chr2       | 1.79E+08    | 1.79E+08   | +      | Nonsense    |
| KRTAP5-8      | 57830     | UNKNO  | hg38       | chr11      | 71538233    | 71538233   | +      | Missense    |
| CACNA1C       | 775       | UNKNO  | hg38       | chr12      | 2685771     | 2685771    | +      | Missense    |
| TP53          | 7157      | UNKNO  | hg38       | chr17      | 7673803     | 7673803    | +      | Missense    |
| MUC16         | 94025     | UNKNO  | hg38       | chr19      | 8979931     | 8979931    | +      | Missense    |
| FLG           |           | UNKNO  | hg38       | chr1       | 1.52E+08    | 1.52E+08   | +      | Missense    |
| TTN           |           | UNKNO  | hg38       | chr2       | 1.79E+08    | 1.79E+08   | +      | Missense    |
| TTN           |           | UNKNO  | hg38       | chr2       | 1.79E+08    | 1.79E+08   | +      | Splice Site |
| TTN           |           | UNKNO  | hg38       | chr2       | 1.79E+08    | 1.79E+08   | +      | Missense    |
| KMT2C         |           | UNKNO  | hg38       | chr7       | 1.52E+08    | 1.52E+08   | +      | Missense    |
| CACNA1C       |           | UNKNO  | hg38       | chr12      | 2685755     | 2685755    | +      | Missense    |
| CACNA1C       |           | UNKNO  | hg38       | chr12      | 2685771     | 2685771    | +      | Missense    |
| RP11-473M10.3 |           | UNKNO  | hg38       | chr13      | 63746743    | 63746743   | +      | Splice Site |
| RP11-473M10.3 |           | UNKNO  | hg38       | chr13      | 63746783    | 63746783   | +      | Splice Site |
| TP53          |           | UNKNO  | hg38       | chr17      | 7673824     | 7673824    | +      | Nonsense    |
| OBSCN         |           | UNKNO  | hg38       | chr1       | 2.28E+08    | 2.28E+08   | +      | Missense    |
| EGFR          |           | UNKNO  | hg38       | chr7       | 55181378    | 55181378   | +      | Missense    |
| EGFR          |           | UNKNO  | hg38       | chr7       | 55191822    | 55191822   | +      | Missense    |
| TP53          |           | UNKNO  | hg38       | chr17      | 7673811     | 7673811    | +      | Missense    |
| TTN           |           | UNKNO  | hg38       | chr2       | 1.79E+08    | 1.79E+08   | +      | Splice Site |
| SYNE1         |           | UNKNO  | hg38       | chr6       | 1.52E+08    | 1.52E+08   | +      | Missense    |
| PRUNE2        |           | UNKNO  | hg38       | chr9       | 76703628    | 76703628   | +      | Missense    |
| ZFHX3         |           | UNKNO  | hg38       | chr16      | 72950696    | 72950696   | +      | Missense    |
| ZNF469        |           | UNKNO  | hg38       | chr16      | 88429693    | 88429693   | +      | Missense    |
| ZNF469        |           | UNKNO  | hg38       | chr16      | 88434477    | 88434477   | +      | Missense    |
| TP53          |           | UNKNO  | hg38       | chr17      | 7676229     | 7676229    | +      | Missense    |
| RYR1          |           | UNKNO  | hg38       | chr19      | 38565383    | 38565383   | +      | Missense    |
| PCNT          |           | UNKNO  | hg38       | chr21      | 46334635    | 46334635   | +      | Missense    |
| CACNA1C       |           | UNKNO  | hg38       | chr12      | 2685771     | 2685771    | +      | Missense    |
| EGFR          | 1956      | UNKNO  | hg38       | chr7       | 55174772    | 55174786   | +      | In_Frame    |
| TP53          | 7157      | UNKNO  | hg38       | chr17      | 7673802     | 7673802    | +      | Missense    |
| MUC16         | 94025     | UNKNO  | hg38       | chr19      | 8952939     | 8952939    | +      | Missense    |
| CACNA1C       |           | UNKNO  | hg38       | chr12      | 2685755     | 2685755    | +      | Missense    |
| CACNA1C       |           | UNKNO  | hg38       | chr12      | 2685771     | 2685771    | +      | Missense    |
| TTN           | 7273      | UNKNO  | hg38       | chr2       | 1.79E+08    | 1.79E+08   | +      | Missense    |
| TTN           | 7273      | UNKNO  | hg38       | chr2       | 1.79E+08    | 1.79E+08   | +      | Missense    |
| TTN           | 7273      | UNKNO  | hg38       | chr2       | 1.79E+08    | 1.79E+08   | +      | Missense    |
| SYNE1         | 23345     | UNKNO  | hg38       | chr6       | 1.52E+08    | 1.52E+08   | +      | Missense    |
| PLEC          | 5339      | UNKNO  | hg38       | chr8       | 1.44E+08    | 1.44E+08   | +      | Missense    |
| CACNA1C       | 775       | UNKNO  | hg38       | chr12      | 2582895     | 2582895    | +      | Missense    |
| RP11-473M10.3 |           | UNKNO  | hg38       | chr13      | 63746743    | 63746743   | +      | Splice Site |
| TP53          | 7157      | UNKNO  | hg38       | chr17      | 7674252     | 7674252    | +      | Missense    |
| NEB           | 4703      | UNKNO  | hg38       | chr2       | 1.51E+08    | 1.51E+08   | +      | Frame Shi   |
| NEB           | 4703      | UNKNO  | hg38       | chr2       | 1.51E+08    | 1.51E+08   | +      | Missense    |
| EGFR          | 1956      | UNKNO  | hg38       | chr7       | 55191822    | 55191822   | +      | Missense    |
| KMT2C         | 58508     | UNKNO  | hg38       | chr7       | 1.52E+08    | 1.52E+08   | +      | Missense    |
| ZFHX3         | 463       | UNKNO  | hg38       | chr16      | 72958249    | 72958250   | +      | Frame Shi   |
| TP53          | 7157      | UNKNO  | hg38       | chr17      | 7674221     | 7674221    | +      | Missense    |
| MUC16         | 94025     | UNKNO  | hg38       | chr19      | 8935421     | 8935421    | +      | Missense    |
| PCNT          | 5116      | UNKNO  | hg38       | chr21      | 46401686    | 46401687   | +      | Frame Shi   |
| FLG           | 2312      | UNKNO  | hg38       | chr1       | 1.52E+08    | 1.52E+08   | +      | Missense    |
| OBSCN         | 84033     | UNKNO  | hg38       | chr1       | 2.28E+08    | 2.28E+08   | +      | In_Frame    |
| TTN           | 7273      | UNKNO  | hg38       | chr2       | 1.79E+08    | 1.79E+08   | +      | Nonsense    |
| FAT4          | 79633     | UNKNO  | hg38       | chr4       | 1.25E+08    | 1.25E+08   | +      | Missense    |
| PLEC          | 5339      | UNKNO  | hg38       | chr8       | 1.44E+08    | 1.44E+08   | +      | Frame Shi   |
| PLEC          | 5339      | UNKNO  | hg38       | chr8       | 1.44E+08    | 1.44E+08   | +      | Missense    |
| KRTAP5-8      | 57830     | UNKNO  | hg38       | chr11      | 71538146    | 71538146   | +      | Missense    |
| RP11-473M10.3 |           | UNKNO  | hg38       | chr13      | 63746743    | 63746743   | +      | Splice Site |

|               |        |       |      |       |          |          |   |             |
|---------------|--------|-------|------|-------|----------|----------|---|-------------|
| PCNT          | 5116   | UNKNO | hg38 | chr21 | 46432056 | 46432059 | + | Frame_Shi   |
| PCNT          | 5116   | UNKNO | hg38 | chr21 | 46432066 | 46432066 | + | Missense    |
| PLEC          | 5339   | UNKNO | hg38 | chr8  | 1.44E+08 | 1.44E+08 | + | Nonsense    |
| KRTAP5-8      | 57830  | UNKNO | hg38 | chr11 | 71538234 | 71538263 | + | In_Frame    |
| PCNT          | 5116   | UNKNO | hg38 | chr21 | 46385960 | 46385960 | + | Frame_Shi   |
| PCNT          | 5116   | UNKNO | hg38 | chr21 | 46385961 | 46385961 | + | Missense    |
| FLG           | 2312   | UNKNO | hg38 | chr1  | 1.52E+08 | 1.52E+08 | + | Missense    |
| NEB           | 4703   | UNKNO | hg38 | chr2  | 1.52E+08 | 1.52E+08 | + | Missense    |
| FAT4          | 79633  | UNKNO | hg38 | chr4  | 1.25E+08 | 1.25E+08 | + | Missense    |
| SYNE1         | 23345  | UNKNO | hg38 | chr6  | 1.52E+08 | 1.52E+08 | + | Splice_Site |
| IGF2R         | 3482   | UNKNO | hg38 | chr6  | 1.6E+08  | 1.6E+08  | + | Splice_Site |
| IGF2R         | 3482   | UNKNO | hg38 | chr6  | 1.6E+08  | 1.6E+08  | + | Missense    |
| EGFR          | 1956   | UNKNO | hg38 | chr7  | 55155904 | 55155904 | + | Missense    |
| KMT2C         | 58508  | UNKNO | hg38 | chr7  | 1.52E+08 | 1.52E+08 | + | Splice_Site |
| KMT2C         | 58508  | UNKNO | hg38 | chr7  | 1.52E+08 | 1.52E+08 | + | Missense    |
| PLEC          | 5339   | UNKNO | hg38 | chr8  | 1.44E+08 | 1.44E+08 | + | Nonsense    |
| TP53          | 7157   | UNKNO | hg38 | chr17 | 7674221  | 7674221  | + | Missense    |
| TTN           |        | UNKNO | hg38 | chr2  | 1.79E+08 | 1.79E+08 | + | Missense    |
| RP11-473M10.3 |        | UNKNO | hg38 | chr13 | 63746743 | 63746743 | + | Splice_Site |
| RP11-473M10.3 |        | UNKNO | hg38 | chr13 | 63746783 | 63746783 | + | Splice_Site |
| ZNF469        |        | UNKNO | hg38 | chr16 | 88437198 | 88437198 | + | Missense    |
| OBSCN         | 84033  | UNKNO | hg38 | chr1  | 2.28E+08 | 2.28E+08 | + | Frame_Shi   |
| TTN           | 7273   | UNKNO | hg38 | chr2  | 1.79E+08 | 1.79E+08 | + | Frame_Shi   |
| RP11-473M10.3 |        | UNKNO | hg38 | chr13 | 63746743 | 63746743 | + | Splice_Site |
| RP11-473M10.3 |        | UNKNO | hg38 | chr13 | 63746783 | 63746783 | + | Splice_Site |
| MUC16         |        | UNKNO | hg38 | chr19 | 8858600  | 8858600  | + | Splice_Site |
| FLG           | 2312   | UNKNO | hg38 | chr1  | 1.52E+08 | 1.52E+08 | + | Missense    |
| KRTAP5-8      | 57830  | UNKNO | hg38 | chr11 | 71538233 | 71538233 | + | Missense    |
| RP11-473M10.3 |        | UNKNO | hg38 | chr13 | 63746743 | 63746743 | + | Splice_Site |
| FLG           | 2312   | UNKNO | hg38 | chr1  | 1.52E+08 | 1.52E+08 | + | Missense    |
| PLEC          | 5339   | UNKNO | hg38 | chr8  | 1.44E+08 | 1.44E+08 | + | Missense    |
| TTN           | 7273   | UNKNO | hg38 | chr2  | 1.79E+08 | 1.79E+08 | + | Missense    |
| KMT2C         | 58508  | UNKNO | hg38 | chr7  | 1.52E+08 | 1.52E+08 | + | Nonsense    |
| KRTAP5-8      | 57830  | UNKNO | hg38 | chr11 | 71538204 | 71538233 | + | In_Frame    |
| TP53          | 7157   | UNKNO | hg38 | chr17 | 7673764  | 7673764  | + | Nonsense    |
| TP53          | 7157   | UNKNO | hg38 | chr17 | 7676054  | 7676055  | + | Frame_Shi   |
| RYR1          | 6261   | UNKNO | hg38 | chr19 | 38512117 | 38512117 | + | Missense    |
| PRUNE2        | 158471 | UNKNO | hg38 | chr9  | 76624467 | 76624467 | + | Missense    |
| KRTAP5-8      | 57830  | UNKNO | hg38 | chr11 | 71538232 | 71538261 | + | In_Frame    |
| MUC16         | 94025  | UNKNO | hg38 | chr19 | 8962411  | 8962411  | + | Missense    |
| FLG           | 2312   | UNKNO | hg38 | chr1  | 1.52E+08 | 1.52E+08 | + | Missense    |
| OBSCN         | 84033  | UNKNO | hg38 | chr1  | 2.28E+08 | 2.28E+08 | + | In_Frame    |
| ZFHX3         | 463    | UNKNO | hg38 | chr16 | 72957799 | 72957816 | + | In_Frame    |
| RP11-473M10.3 |        | UNKNO | hg38 | chr13 | 63746743 | 63746743 | + | Splice_Site |
| KRTAP5-8      | 57830  | UNKNO | hg38 | chr11 | 71538232 | 71538261 | + | In_Frame    |
| ZFHX3         | 463    | UNKNO | hg38 | chr16 | 72797500 | 72797500 | + | Nonsense    |
| FLG           | 2312   | UNKNO | hg38 | chr1  | 1.52E+08 | 1.52E+08 | + | Missense    |
| TP53          | 7157   | UNKNO | hg38 | chr17 | 7674258  | 7674259  | + | Frame_Shi   |
| TP53          | 7157   | UNKNO | hg38 | chr17 | 7674259  | 7674260  | + | Frame_Shi   |
| EGFR          | 1956   | UNKNO | hg38 | chr7  | 55174775 | 55174789 | + | In_Frame    |
| TTN           | 7273   | UNKNO | hg38 | chr2  | 1.79E+08 | 1.79E+08 | + | Missense    |
| EGFR          | 1956   | UNKNO | hg38 | chr7  | 55174772 | 55174786 | + | In_Frame    |
| EGFR          | 1956   | UNKNO | hg38 | chr7  | 55181378 | 55181378 | + | Missense    |
| KRTAP5-8      | 57830  | UNKNO | hg38 | chr11 | 71538202 | 71538261 | + | In_Frame    |
| CACNA1C       | 775    | UNKNO | hg38 | chr12 | 2504867  | 2504867  | + | Nonsense    |
| RP11-473M10.3 |        | UNKNO | hg38 | chr13 | 63746743 | 63746743 | + | Splice_Site |
| FLG           | 2312   | UNKNO | hg38 | chr1  | 1.52E+08 | 1.52E+08 | + | Missense    |
| KMT2C         | 58508  | UNKNO | hg38 | chr7  | 1.52E+08 | 1.52E+08 | + | Missense    |
| ZNF469        | 84627  | UNKNO | hg38 | chr16 | 88429593 | 88429593 | + | Frame_Shi   |
| EGFR          | 1956   | UNKNO | hg38 | chr7  | 55191822 | 55191822 | + | Missense    |

|               |        |       |      |       |          |          |   |             |
|---------------|--------|-------|------|-------|----------|----------|---|-------------|
| RYR1          | 6261   | UNKNO | hg38 | chr19 | 38489366 | 38489368 | + | In_Frame    |
| OBSCN         | 84033  | UNKNO | hg38 | chr1  | 2.28E+08 | 2.28E+08 | + | Missense    |
| FAT4          | 79633  | UNKNO | hg38 | chr4  | 1.25E+08 | 1.25E+08 | + | Missense    |
| EGFR          | 1956   | UNKNO | hg38 | chr7  | 55191822 | 55191822 | + | Missense    |
| ZNF469        | 84627  | UNKNO | hg38 | chr16 | 88433969 | 88433980 | + | In_Frame    |
| TP53          | 7157   | UNKNO | hg38 | chr17 | 7673811  | 7673811  | + | Missense    |
| MUC16         | 94025  | UNKNO | hg38 | chr19 | 8891178  | 8891178  | + | Missense    |
| EGFR          | 1956   | UNKNO | hg38 | chr7  | 55174774 | 55174775 | + | Frame_Shi   |
| EGFR          | 1956   | UNKNO | hg38 | chr7  | 55174777 | 55174792 | + | Frame_Shi   |
| TP53          | 7157   | UNKNO | hg38 | chr17 | 7670700  | 7670700  | + | Missense    |
| NEB           | 4703   | UNKNO | hg38 | chr2  | 1.52E+08 | 1.52E+08 | + | Missense    |
| TTN           | 7273   | UNKNO | hg38 | chr2  | 1.79E+08 | 1.79E+08 | + | Missense    |
| TTN           | 7273   | UNKNO | hg38 | chr2  | 1.79E+08 | 1.79E+08 | + | Missense    |
| TTN           | 7273   | UNKNO | hg38 | chr2  | 1.79E+08 | 1.79E+08 | + | Missense    |
| TTN           | 7273   | UNKNO | hg38 | chr2  | 1.79E+08 | 1.79E+08 | + | Missense    |
| SYNE1         | 23345  | UNKNO | hg38 | chr6  | 1.52E+08 | 1.52E+08 | + | Missense    |
| SYNE1         | 23345  | UNKNO | hg38 | chr6  | 1.52E+08 | 1.52E+08 | + | Missense    |
| PRUNE2        | 158471 | UNKNO | hg38 | chr9  | 76854195 | 76854195 | + | Missense    |
| RP11-473M10.3 |        | UNKNO | hg38 | chr13 | 63746743 | 63746743 | + | Splice_Site |
| PCNT          | 5116   | UNKNO | hg38 | chr21 | 46399613 | 46399613 | + | Missense    |
| FLG           | 2312   | UNKNO | hg38 | chr1  | 1.52E+08 | 1.52E+08 | + | Nonsense    |
| NEB           | 4703   | UNKNO | hg38 | chr2  | 1.52E+08 | 1.52E+08 | + | Frame_Shi   |
| TTN           | 7273   | UNKNO | hg38 | chr2  | 1.79E+08 | 1.79E+08 | + | Missense    |
| FAT4          | 79633  | UNKNO | hg38 | chr4  | 1.25E+08 | 1.25E+08 | + | Missense    |
| EGFR          | 1956   | UNKNO | hg38 | chr7  | 55191822 | 55191822 | + | Missense    |
| SYNE1         | 23345  | UNKNO | hg38 | chr6  | 1.52E+08 | 1.52E+08 | + | Missense    |
| PLEC          | 5339   | UNKNO | hg38 | chr8  | 1.44E+08 | 1.44E+08 | + | Missense    |
| PRUNE2        | 158471 | UNKNO | hg38 | chr9  | 76703344 | 76703344 | + | Missense    |
| ZNF469        | 84627  | UNKNO | hg38 | chr16 | 88433597 | 88433597 | + | Missense    |
| RYR1          | 6261   | UNKNO | hg38 | chr19 | 38469003 | 38469003 | + | Missense    |
| TTN           |        | UNKNO | hg38 | chr2  | 1.79E+08 | 1.79E+08 | + | Missense    |
| MUC16         |        | UNKNO | hg38 | chr19 | 8977376  | 8977376  | + | Missense    |
| IGF2R         | 3482   | UNKNO | hg38 | chr6  | 1.6E+08  | 1.6E+08  | + | Missense    |
| TTN           |        | UNKNO | hg38 | chr2  | 1.79E+08 | 1.79E+08 | + | Missense    |
| CACNA1C       |        | UNKNO | hg38 | chr12 | 2666736  | 2666736  | + | Missense    |
| MUC16         |        | UNKNO | hg38 | chr19 | 8863399  | 8863399  | + | Missense    |
| OBSCN         |        | UNKNO | hg38 | chr1  | 2.28E+08 | 2.28E+08 | + | Missense    |
| ZNF469        |        | UNKNO | hg38 | chr16 | 88433723 | 88433723 | + | Missense    |
| TP53          |        | UNKNO | hg38 | chr17 | 7674953  | 7674953  | + | Missense    |
| RYR1          |        | UNKNO | hg38 | chr19 | 38505893 | 38505893 | + | Missense    |
| OBSCN         | 84033  | UNKNO | hg38 | chr1  | 2.28E+08 | 2.28E+08 | + | Missense    |
| NEB           | 4703   | UNKNO | hg38 | chr2  | 1.52E+08 | 1.52E+08 | + | Missense    |
| TTN           | 7273   | UNKNO | hg38 | chr2  | 1.79E+08 | 1.79E+08 | + | Missense    |
| PLEC          | 5339   | UNKNO | hg38 | chr8  | 1.44E+08 | 1.44E+08 | + | Missense    |
| PRUNE2        | 158471 | UNKNO | hg38 | chr9  | 76703458 | 76703460 | + | In_Frame    |
| KRTAP5-8      | 57830  | UNKNO | hg38 | chr11 | 71538530 | 71538530 | + | Missense    |
| MUC16         | 94025  | UNKNO | hg38 | chr19 | 8910493  | 8910493  | + | Missense    |
| RYR1          | 6261   | UNKNO | hg38 | chr19 | 38565769 | 38565769 | + | Missense    |
| FLG           | 2312   | UNKNO | hg38 | chr1  | 1.52E+08 | 1.52E+08 | + | Missense    |
| OBSCN         | 84033  | UNKNO | hg38 | chr1  | 2.28E+08 | 2.28E+08 | + | Nonsense    |
| OBSCN         | 84033  | UNKNO | hg38 | chr1  | 2.28E+08 | 2.28E+08 | + | Missense    |
| OBSCN         | 84033  | UNKNO | hg38 | chr1  | 2.28E+08 | 2.28E+08 | + | Missense    |
| NEB           | 4703   | UNKNO | hg38 | chr2  | 1.51E+08 | 1.51E+08 | + | Missense    |
| NEB           | 4703   | UNKNO | hg38 | chr2  | 1.52E+08 | 1.52E+08 | + | Missense    |
| TTN           | 7273   | UNKNO | hg38 | chr2  | 1.79E+08 | 1.79E+08 | + | Missense    |
| TTN           | 7273   | UNKNO | hg38 | chr2  | 1.79E+08 | 1.79E+08 | + | Missense    |
| FAT4          | 79633  | UNKNO | hg38 | chr4  | 1.25E+08 | 1.25E+08 | + | Missense    |
| SYNE1         | 23345  | UNKNO | hg38 | chr6  | 1.52E+08 | 1.52E+08 | + | Missense    |
| PLEC          | 5339   | UNKNO | hg38 | chr8  | 1.44E+08 | 1.44E+08 | + | Missense    |
| PRUNE2        | 158471 | UNKNO | hg38 | chr9  | 76655470 | 76655470 | + | Missense    |

|          |        |       |      |       |          |          |   |             |
|----------|--------|-------|------|-------|----------|----------|---|-------------|
| KRTAP5-8 | 57830  | UNKNO | hg38 | chr11 | 71538119 | 71538119 | + | Missense    |
| ZFHX3    | 463    | UNKNO | hg38 | chr16 | 72787502 | 72787502 | + | Missense    |
| ZFHX3    | 463    | UNKNO | hg38 | chr16 | 72796552 | 72796552 | + | Missense    |
| ZNF469   | 84627  | UNKNO | hg38 | chr16 | 88429439 | 88429439 | + | Missense    |
| MUC16    | 94025  | UNKNO | hg38 | chr19 | 8965141  | 8965141  | + | Missense    |
| RYR1     | 6261   | UNKNO | hg38 | chr19 | 38505861 | 38505861 | + | Missense    |
| TTN      | 7273   | UNKNO | hg38 | chr2  | 1.79E+08 | 1.79E+08 | + | Missense    |
| KMT2C    | 58508  | UNKNO | hg38 | chr7  | 1.52E+08 | 1.52E+08 | + | Missense    |
| KMT2C    | 58508  | UNKNO | hg38 | chr7  | 1.52E+08 | 1.52E+08 | + | Missense    |
| ZFHX3    | 463    | UNKNO | hg38 | chr16 | 72794710 | 72794710 | + | Missense    |
| ZNF469   | 84627  | UNKNO | hg38 | chr16 | 88430387 | 88430387 | + | Missense    |
| MUC16    | 94025  | UNKNO | hg38 | chr19 | 8896089  | 8896089  | + | Splice Site |
| MUC16    | 94025  | UNKNO | hg38 | chr19 | 8956807  | 8956807  | + | Missense    |
| RYR1     | 6261   | UNKNO | hg38 | chr19 | 38507826 | 38507826 | + | Splice Site |
| FLG      | 2312   | UNKNO | hg38 | chr1  | 1.52E+08 | 1.52E+08 | + | Missense    |
| TTN      | 7273   | UNKNO | hg38 | chr2  | 1.79E+08 | 1.79E+08 | + | Missense    |
| TTN      | 7273   | UNKNO | hg38 | chr2  | 1.79E+08 | 1.79E+08 | + | Missense    |
| PRUNE2   | 158471 | UNKNO | hg38 | chr9  | 76703504 | 76703504 | + | Missense    |
| MUC16    | 94025  | UNKNO | hg38 | chr19 | 8898652  | 8898652  | + | Missense    |
| SYNE1    | 23345  | UNKNO | hg38 | chr6  | 1.52E+08 | 1.52E+08 | + | Missense    |
| KMT2C    | 58508  | UNKNO | hg38 | chr7  | 1.52E+08 | 1.52E+08 | + | Missense    |
| ZFHX3    | 463    | UNKNO | hg38 | chr16 | 72958722 | 72958722 | + | Missense    |
| TP53     | 7157   | UNKNO | hg38 | chr17 | 7675094  | 7675094  | + | Missense    |
| MUC16    | 94025  | UNKNO | hg38 | chr19 | 8861026  | 8861026  | + | Missense    |
| RYR1     | 6261   | UNKNO | hg38 | chr19 | 38585027 | 38585027 | + | Nonsense    |
| PCNT     | 5116   | UNKNO | hg38 | chr21 | 46349790 | 46349790 | + | Missense    |
| OBSCN    |        | UNKNO | hg38 | chr1  | 2.28E+08 | 2.28E+08 | + | Missense    |
| OBSCN    |        | UNKNO | hg38 | chr1  | 2.28E+08 | 2.28E+08 | + | Missense    |
| NEB      |        | UNKNO | hg38 | chr2  | 1.52E+08 | 1.52E+08 | + | Missense    |
| TTN      |        | UNKNO | hg38 | chr2  | 1.79E+08 | 1.79E+08 | + | Missense    |
| TTN      |        | UNKNO | hg38 | chr2  | 1.79E+08 | 1.79E+08 | + | Frame Shi   |
| TTN      |        | UNKNO | hg38 | chr2  | 1.79E+08 | 1.79E+08 | + | Missense    |
| TTN      |        | UNKNO | hg38 | chr2  | 1.79E+08 | 1.79E+08 | + | Nonsense    |
| TTN      |        | UNKNO | hg38 | chr2  | 1.79E+08 | 1.79E+08 | + | Missense    |
| TTN      |        | UNKNO | hg38 | chr2  | 1.79E+08 | 1.79E+08 | + | Missense    |
| TTN      |        | UNKNO | hg38 | chr2  | 1.79E+08 | 1.79E+08 | + | Missense    |
| TTN      |        | UNKNO | hg38 | chr2  | 1.79E+08 | 1.79E+08 | + | Splice Site |
| TTN      |        | UNKNO | hg38 | chr2  | 1.79E+08 | 1.79E+08 | + | Missense    |
| TTN      |        | UNKNO | hg38 | chr2  | 1.79E+08 | 1.79E+08 | + | Missense    |
| TTN      |        | UNKNO | hg38 | chr2  | 1.79E+08 | 1.79E+08 | + | Nonsense    |
| TTN      |        | UNKNO | hg38 | chr2  | 1.79E+08 | 1.79E+08 | + | Missense    |
| TTN      |        | UNKNO | hg38 | chr2  | 1.79E+08 | 1.79E+08 | + | Missense    |
| FAT4     |        | UNKNO | hg38 | chr4  | 1.25E+08 | 1.25E+08 | + | Missense    |
| PLEC     |        | UNKNO | hg38 | chr8  | 1.44E+08 | 1.44E+08 | + | Missense    |
| PRUNE2   |        | UNKNO | hg38 | chr9  | 76706347 | 76706347 | + | Missense    |
| CACNA1C  |        | UNKNO | hg38 | chr12 | 2606987  | 2606987  | + | Frame Shi   |
| TP53     |        | UNKNO | hg38 | chr17 | 7676040  | 7676040  | + | Missense    |
| MUC16    |        | UNKNO | hg38 | chr19 | 8964537  | 8964537  | + | Missense    |
| RYR1     |        | UNKNO | hg38 | chr19 | 38510556 | 38510557 | + | Frame Shi   |
| TP53     | 7157   | UNKNO | hg38 | chr17 | 7676097  | 7676097  | + | Nonsense    |
| PCNT     | 5116   | UNKNO | hg38 | chr21 | 46428548 | 46428548 | + | Missense    |
| KMT2C    | 58508  | UNKNO | hg38 | chr7  | 1.52E+08 | 1.52E+08 | + | Missense    |
| ZFHX3    | 463    | UNKNO | hg38 | chr16 | 72958642 | 72958642 | + | Nonsense    |
| MUC16    | 94025  | UNKNO | hg38 | chr19 | 8904971  | 8904971  | + | Missense    |
| MUC16    | 94025  | UNKNO | hg38 | chr19 | 8946438  | 8946438  | + | Missense    |
| EGFR     |        | UNKNO | hg38 | chr7  | 55174773 | 55174787 | + | In_Frame    |
| RYR1     |        | UNKNO | hg38 | chr19 | 38587386 | 38587386 | + | Missense    |



|        |       |       |      |       |          |          |   |             |
|--------|-------|-------|------|-------|----------|----------|---|-------------|
| KMT2C  | 58508 | UNKNO | hg38 | chr7  | 1.52E+08 | 1.52E+08 | + | Missense    |
| FLG    |       | UNKNO | hg38 | chr1  | 1.52E+08 | 1.52E+08 | + | Missense    |
| FLG    |       | UNKNO | hg38 | chr1  | 1.52E+08 | 1.52E+08 | + | Missense    |
| OBSCN  |       | UNKNO | hg38 | chr1  | 2.28E+08 | 2.28E+08 | + | Missense    |
| TTN    |       | UNKNO | hg38 | chr2  | 1.79E+08 | 1.79E+08 | + | Missense    |
| TTN    |       | UNKNO | hg38 | chr2  | 1.79E+08 | 1.79E+08 | + | Nonsense    |
| TTN    |       | UNKNO | hg38 | chr2  | 1.79E+08 | 1.79E+08 | + | Nonsense    |
| FAT4   |       | UNKNO | hg38 | chr4  | 1.25E+08 | 1.25E+08 | + | Missense    |
| SYNE1  |       | UNKNO | hg38 | chr6  | 1.52E+08 | 1.52E+08 | + | Nonsense    |
| SYNE1  |       | UNKNO | hg38 | chr6  | 1.52E+08 | 1.52E+08 | + | Missense    |
| IGF2R  |       | UNKNO | hg38 | chr6  | 1.6E+08  | 1.6E+08  | + | Missense    |
| KMT2C  |       | UNKNO | hg38 | chr7  | 1.52E+08 | 1.52E+08 | + | Missense    |
| PRUNE2 |       | UNKNO | hg38 | chr9  | 76707698 | 76707698 | + | Missense    |
| TP53   |       | UNKNO | hg38 | chr17 | 7673782  | 7673782  | + | Missense    |
| MUC16  |       | UNKNO | hg38 | chr19 | 8952522  | 8952522  | + | Missense    |
| MUC16  |       | UNKNO | hg38 | chr19 | 8974664  | 8974664  | + | Missense    |
| MUC16  |       | UNKNO | hg38 | chr19 | 8975853  | 8975853  | + | Missense    |
| NEB    | 4703  | UNKNO | hg38 | chr2  | 1.52E+08 | 1.52E+08 | + | Missense    |
| TTN    | 7273  | UNKNO | hg38 | chr2  | 1.79E+08 | 1.79E+08 | + | Missense    |
| TTN    | 7273  | UNKNO | hg38 | chr2  | 1.79E+08 | 1.79E+08 | + | Missense    |
| TTN    | 7273  | UNKNO | hg38 | chr2  | 1.79E+08 | 1.79E+08 | + | Missense    |
| FAT4   | 79633 | UNKNO | hg38 | chr4  | 1.25E+08 | 1.25E+08 | + | Nonsense    |
| SYNE1  | 23345 | UNKNO | hg38 | chr6  | 1.52E+08 | 1.52E+08 | + | Missense    |
| EGFR   | 1956  | UNKNO | hg38 | chr7  | 55156502 | 55156537 | + | Splice_Site |
| ZFHX3  | 463   | UNKNO | hg38 | chr16 | 72797476 | 72797476 | + | Missense    |
| ZFHX3  | 463   | UNKNO | hg38 | chr16 | 72798289 | 72798289 | + | Missense    |
| ZNF469 | 84627 | UNKNO | hg38 | chr16 | 88434470 | 88434470 | + | Missense    |
| MUC16  | 94025 | UNKNO | hg38 | chr19 | 8862940  | 8862940  | + | Splice_Site |
| MUC16  | 94025 | UNKNO | hg38 | chr19 | 8958939  | 8958939  | + | Missense    |
| MUC16  | 94025 | UNKNO | hg38 | chr19 | 8977261  | 8977261  | + | Missense    |
| PCNT   | 5116  | UNKNO | hg38 | chr21 | 46385979 | 46385979 | + | Missense    |
| IGF2R  | 3482  | UNKNO | hg38 | chr6  | 1.61E+08 | 1.61E+08 | + | Missense    |
| IGF2R  | 3482  | UNKNO | hg38 | chr6  | 1.61E+08 | 1.61E+08 | + | Missense    |
| IGF2R  | 3482  | UNKNO | hg38 | chr6  | 1.61E+08 | 1.61E+08 | + | Missense    |
| IGF2R  | 3482  | UNKNO | hg38 | chr6  | 1.61E+08 | 1.61E+08 | + | Missense    |
| IGF2R  | 3482  | UNKNO | hg38 | chr6  | 1.6E+08  | 1.6E+08  | + | Missense    |
| IGF2R  | 3482  | UNKNO | hg38 | chr6  | 1.6E+08  | 1.6E+08  | + | Missense    |
| IGF2R  | 3482  | UNKNO | hg38 | chr6  | 1.6E+08  | 1.6E+08  | + | Intron      |

| Variant_Ty | Reference | Tumor_Seq | Tumor_Seqdb | SNP_RS | SNP_Val | Tumor_Sa | Matched_N | Match_Nor |
|------------|-----------|-----------|-------------|--------|---------|----------|-----------|-----------|
| SNP        | C         | C         | A           |        |         | pt2      | UNKNO     | UNKNO     |
| SNP        | C         | C         | T           |        |         | pt2      | UNKNO     | UNKNO     |
| SNP        | C         | C         | T           |        |         | pt2      | UNKNO     | UNKNO     |
| SNP        | G         | G         | A           |        |         | pt2      | UNKNO     | UNKNO     |
| SNP        | G         | G         | A           |        |         | pt2      | UNKNO     | UNKNO     |
| SNP        | T         | T         | C           |        |         | pt3      | UNKNO     | UNKNO     |
| SNP        | C         | C         | G           |        |         | pt3      | UNKNO     | UNKNO     |
| DEL        | TGGGCGA   | TGGGCGA   | -           |        |         | pt3      | UNKNO     | UNKNO     |
| SNP        | C         | C         | G           |        |         | pt3      | UNKNO     | UNKNO     |
| SNP        | C         | C         | A           |        |         | pt3      | UNKNO     | UNKNO     |
| SNP        | G         | G         | A           |        |         | pt3      | UNKNO     | UNKNO     |
| SNP        | C         | C         | T           |        |         | pt3      | UNKNO     | UNKNO     |
| SNP        | C         | C         | T           |        |         | pt3      | UNKNO     | UNKNO     |
| SNP        | T         | T         | G           |        |         | pt3      | UNKNO     | UNKNO     |
| SNP        | C         | C         | A           |        |         | pt3      | UNKNO     | UNKNO     |
| SNP        | G         | G         | A           |        |         | pt4      | UNKNO     | UNKNO     |
| SNP        | C         | C         | T           |        |         | pt4      | UNKNO     | UNKNO     |
| SNP        | T         | T         | G           |        |         | pt4      | UNKNO     | UNKNO     |
| SNP        | A         | A         | G           |        |         | pt4      | UNKNO     | UNKNO     |
| SNP        | A         | A         | T           |        |         | pt5      | UNKNO     | UNKNO     |
| SNP        | T         | T         | C           |        |         | pt5      | UNKNO     | UNKNO     |
| SNP        | G         | G         | A           |        |         | pt5      | UNKNO     | UNKNO     |
| SNP        | C         | C         | T           |        |         | pt5      | UNKNO     | UNKNO     |
| SNP        | C         | C         | A           |        |         | pt5      | UNKNO     | UNKNO     |
| SNP        | G         | G         | A           |        |         | pt5      | UNKNO     | UNKNO     |
| SNP        | G         | G         | A           |        |         | pt5      | UNKNO     | UNKNO     |
| SNP        | C         | C         | A           |        |         | pt5      | UNKNO     | UNKNO     |
| SNP        | G         | G         | A           |        |         | pt5      | UNKNO     | UNKNO     |
| SNP        | C         | C         | T           |        |         | pt7      | UNKNO     | UNKNO     |
| DEL        | GGAATTA   | GGAATTA   | -           |        |         | pt9      | UNKNO     | UNKNO     |
| SNP        | C         | C         | T           |        |         | pt9      | UNKNO     | UNKNO     |
| SNP        | G         | G         | A           |        |         | pt9      | UNKNO     | UNKNO     |
| SNP        | G         | G         | A           |        |         | pt10     | UNKNO     | UNKNO     |
| SNP        | C         | C         | T           |        |         | pt10     | UNKNO     | UNKNO     |
| SNP        | C         | C         | T           |        |         | pt11     | UNKNO     | UNKNO     |
| SNP        | C         | C         | A           |        |         | pt11     | UNKNO     | UNKNO     |
| SNP        | G         | G         | T           |        |         | pt11     | UNKNO     | UNKNO     |
| SNP        | A         | A         | G           |        |         | pt11     | UNKNO     | UNKNO     |
| SNP        | C         | C         | G           |        |         | pt11     | UNKNO     | UNKNO     |
| SNP        | G         | G         | A           |        |         | pt11     | UNKNO     | UNKNO     |
| SNP        | C         | C         | T           |        |         | pt11     | UNKNO     | UNKNO     |
| SNP        | C         | C         | G           |        |         | pt11     | UNKNO     | UNKNO     |
| DEL        | GC        | GC        | -           |        |         | pt12     | UNKNO     | UNKNO     |
| SNP        | C         | C         | A           |        |         | pt12     | UNKNO     | UNKNO     |
| SNP        | T         | T         | G           |        |         | pt12     | UNKNO     | UNKNO     |
| SNP        | G         | G         | A           |        |         | pt12     | UNKNO     | UNKNO     |
| DEL        | CC        | CC        | -           |        |         | pt12     | UNKNO     | UNKNO     |
| SNP        | G         | G         | A           |        |         | pt12     | UNKNO     | UNKNO     |
| SNP        | G         | G         | A           |        |         | pt12     | UNKNO     | UNKNO     |
| DEL        | GT        | GT        | -           |        |         | pt12     | UNKNO     | UNKNO     |
| SNP        | C         | C         | T           |        |         | pt13     | UNKNO     | UNKNO     |
| DEL        | CAC       | CAC       | -           |        |         | pt13     | UNKNO     | UNKNO     |
| SNP        | G         | G         | A           |        |         | pt13     | UNKNO     | UNKNO     |
| SNP        | G         | G         | A           |        |         | pt13     | UNKNO     | UNKNO     |
| DEL        | CG        | CG        | -           |        |         | pt13     | UNKNO     | UNKNO     |
| SNP        | G         | G         | T           |        |         | pt13     | UNKNO     | UNKNO     |
| SNP        | C         | C         | T           |        |         | pt13     | UNKNO     | UNKNO     |
| SNP        | C         | C         | T           |        |         | pt13     | UNKNO     | UNKNO     |

|     |         |         |      |  |  |      |       |       |
|-----|---------|---------|------|--|--|------|-------|-------|
| DEL | GAGG    | GAGG    | -    |  |  | pt13 | UNKNO | UNKNO |
| SNP | C       | C       | A    |  |  | pt13 | UNKNO | UNKNO |
| SNP | C       | C       | A    |  |  | pt14 | UNKNO | UNKNO |
| DEL | GTGGCTC | GTGGCTC | -    |  |  | pt14 | UNKNO | UNKNO |
| DEL | C       | C       | -    |  |  | pt14 | UNKNO | UNKNO |
| SNP | G       | G       | A    |  |  | pt14 | UNKNO | UNKNO |
| DNP | TC      | TC      | AA   |  |  | pt15 | UNKNO | UNKNO |
| SNP | G       | G       | A    |  |  | pt15 | UNKNO | UNKNO |
| SNP | T       | T       | C    |  |  | pt15 | UNKNO | UNKNO |
| SNP | A       | A       | T    |  |  | pt15 | UNKNO | UNKNO |
| SNP | G       | G       | T    |  |  | pt15 | UNKNO | UNKNO |
| SNP | G       | G       | A    |  |  | pt15 | UNKNO | UNKNO |
| SNP | A       | A       | T    |  |  | pt15 | UNKNO | UNKNO |
| SNP | C       | C       | T    |  |  | pt15 | UNKNO | UNKNO |
| SNP | G       | G       | A    |  |  | pt15 | UNKNO | UNKNO |
| SNP | G       | G       | A    |  |  | pt15 | UNKNO | UNKNO |
| SNP | C       | C       | T    |  |  | pt16 | UNKNO | UNKNO |
| SNP | C       | C       | T    |  |  | pt16 | UNKNO | UNKNO |
| SNP | T       | T       | G    |  |  | pt16 | UNKNO | UNKNO |
| SNP | G       | G       | A    |  |  | pt16 | UNKNO | UNKNO |
| DEL | GGCC    | GGCC    | -    |  |  | pt17 | UNKNO | UNKNO |
| DEL | GGAA    | GGAA    | -    |  |  | pt17 | UNKNO | UNKNO |
| SNP | C       | C       | T    |  |  | pt18 | UNKNO | UNKNO |
| SNP | T       | T       | G    |  |  | pt18 | UNKNO | UNKNO |
| SNP | C       | C       | T    |  |  | pt18 | UNKNO | UNKNO |
| SNP | G       | G       | C    |  |  | pt19 | UNKNO | UNKNO |
| SNP | C       | C       | T    |  |  | pt19 | UNKNO | UNKNO |
| SNP | C       | C       | T    |  |  | pt19 | UNKNO | UNKNO |
| SNP | A       | A       | G    |  |  | pt20 | UNKNO | UNKNO |
| SNP | G       | G       | A    |  |  | pt20 | UNKNO | UNKNO |
| SNP | C       | C       | T    |  |  | pt21 | UNKNO | UNKNO |
| SNP | G       | G       | A    |  |  | pt21 | UNKNO | UNKNO |
| DEL | GTGGCTC | GTGGCTC | -    |  |  | pt21 | UNKNO | UNKNO |
| SNP | C       | C       | A    |  |  | pt21 | UNKNO | UNKNO |
| INS | -       | -       | CC   |  |  | pt21 | UNKNO | UNKNO |
| SNP | G       | G       | A    |  |  | pt21 | UNKNO | UNKNO |
| SNP | G       | G       | A    |  |  | pt22 | UNKNO | UNKNO |
| DEL | CCGTGGC | CCGTGGC | -    |  |  | pt22 | UNKNO | UNKNO |
| SNP | C       | C       | T    |  |  | pt22 | UNKNO | UNKNO |
| SNP | C       | C       | T    |  |  | pt23 | UNKNO | UNKNO |
| DEL | CCC     | CCC     | -    |  |  | pt23 | UNKNO | UNKNO |
| DEL | CCGCCGC | CCGCCGC | -    |  |  | pt23 | UNKNO | UNKNO |
| SNP | C       | C       | T    |  |  | pt25 | UNKNO | UNKNO |
| DEL | CCGTGGC | CCGTGGC | -    |  |  | pt26 | UNKNO | UNKNO |
| SNP | G       | G       | A    |  |  | pt26 | UNKNO | UNKNO |
| SNP | C       | C       | T    |  |  | pt28 | UNKNO | UNKNO |
| INS | -       | -       | C    |  |  | pt28 | UNKNO | UNKNO |
| INS | -       | -       | GTAG |  |  | pt28 | UNKNO | UNKNO |
| DEL | ATTAAGA | ATTAAGA | -    |  |  | pt29 | UNKNO | UNKNO |
| SNP | G       | G       | C    |  |  | pt30 | UNKNO | UNKNO |
| DEL | GGAATTA | GGAATTA | -    |  |  | pt30 | UNKNO | UNKNO |
| SNP | C       | C       | T    |  |  | pt30 | UNKNO | UNKNO |
| DEL | CTGTGGC | CTGTGGC | -    |  |  | pt30 | UNKNO | UNKNO |
| SNP | G       | G       | A    |  |  | pt30 | UNKNO | UNKNO |
| SNP | C       | C       | T    |  |  | pt30 | UNKNO | UNKNO |
| SNP | T       | T       | G    |  |  | pt31 | UNKNO | UNKNO |
| SNP | C       | C       | A    |  |  | pt31 | UNKNO | UNKNO |
| DEL | C       | C       | -    |  |  | pt31 | UNKNO | UNKNO |
| SNP | T       | T       | G    |  |  | pt32 | UNKNO | UNKNO |





|     |         |          |   |  |  |      |       |       |
|-----|---------|----------|---|--|--|------|-------|-------|
| SNP | G       | G        | A |  |  | pt56 | UNKNO | UNKNO |
| SNP | G       | G        | T |  |  | pt57 | UNKNO | UNKNO |
| SNP | G       | G        | T |  |  | pt57 | UNKNO | UNKNO |
| SNP | G       | G        | T |  |  | pt57 | UNKNO | UNKNO |
| SNP | G       | G        | A |  |  | pt57 | UNKNO | UNKNO |
| SNP | C       | C        | A |  |  | pt57 | UNKNO | UNKNO |
| SNP | C       | C        | A |  |  | pt57 | UNKNO | UNKNO |
| SNP | G       | G        | T |  |  | pt57 | UNKNO | UNKNO |
| SNP | C       | C        | A |  |  | pt57 | UNKNO | UNKNO |
| SNP | T       | T        | G |  |  | pt57 | UNKNO | UNKNO |
| SNP | G       | G        | T |  |  | pt57 | UNKNO | UNKNO |
| SNP | C       | C        | A |  |  | pt57 | UNKNO | UNKNO |
| SNP | C       | C        | G |  |  | pt57 | UNKNO | UNKNO |
| SNP | T       | T        | C |  |  | pt57 | UNKNO | UNKNO |
| SNP | A       | A        | G |  |  | pt57 | UNKNO | UNKNO |
| SNP | G       | G        | T |  |  | pt57 | UNKNO | UNKNO |
| SNP | G       | G        | T |  |  | pt57 | UNKNO | UNKNO |
| SNP | A       | A        | C |  |  | pt58 | UNKNO | UNKNO |
| SNP | G       | G        | A |  |  | pt58 | UNKNO | UNKNO |
| SNP | G       | G        | A |  |  | pt58 | UNKNO | UNKNO |
| SNP | G       | G        | A |  |  | pt58 | UNKNO | UNKNO |
| SNP | C       | C        | T |  |  | pt58 | UNKNO | UNKNO |
| SNP | C       | C        | T |  |  | pt58 | UNKNO | UNKNO |
| DEL | AACGGAA | AACGGAA- |   |  |  | pt58 | UNKNO | UNKNO |
| SNP | G       | G        | C |  |  | pt58 | UNKNO | UNKNO |
| SNP | C       | C        | T |  |  | pt58 | UNKNO | UNKNO |
| SNP | A       | A        | G |  |  | pt58 | UNKNO | UNKNO |
| SNP | C       | C        | T |  |  | pt58 | UNKNO | UNKNO |
| SNP | G       | G        | T |  |  | pt58 | UNKNO | UNKNO |
| SNP | G       | G        | A |  |  | pt58 | UNKNO | UNKNO |
| SNP | G       | G        | A |  |  | pt58 | UNKNO | UNKNO |
| SNP | G       | G        | A |  |  | pt50 | UNKNO | UNKNO |
| SNP | G       | G        | A |  |  | pt35 | UNKNO | UNKNO |
| SNP | G       | G        | A |  |  | pt58 | UNKNO | UNKNO |
| SNP | G       | G        | A |  |  | pt47 | UNKNO | UNKNO |
| SNP | A       | A        | T |  |  | pt12 | UNKNO | UNKNO |
| SNP | A       | A        | T |  |  | pt49 | UNKNO | UNKNO |
| SNP | A       | A        | T |  |  | pt5  | UNKNO | UNKNO |
| SNP | A       | A        | T |  |  | pt11 | UNKNO | UNKNO |













| Sequence | Validation | Score | BAM_File | Sequencer | Tumor_Sar | Matched_N | Annotation | Protein_Ch |
|----------|------------|-------|----------|-----------|-----------|-----------|------------|------------|
| UNKNO    | UNKNO      | UNKNO |          | UNKNO     | UNKNO     | UNKNO     | ENST0000   | p.E8619*   |
| UNKNO    | UNKNO      | UNKNO |          | UNKNO     | UNKNO     | UNKNO     | ENST0000   | p.R60C     |
| UNKNO    | UNKNO      | UNKNO |          | UNKNO     | UNKNO     | UNKNO     | ENST0000   | p.T1918M   |
| UNKNO    | UNKNO      | UNKNO |          | UNKNO     | UNKNO     | UNKNO     | ENST0000   | p.R273C    |
| UNKNO    | UNKNO      | UNKNO |          | UNKNO     | UNKNO     | UNKNO     | ENST0000   | p.A403V    |
| UNKNO    | UNKNO      | UNKNO |          | UNKNO     | UNKNO     | UNKNO     | ENST0000   | p.T840A    |
| UNKNO    | UNKNO      | UNKNO |          | UNKNO     | UNKNO     | UNKNO     | ENST0000   | p.G20158R  |
| UNKNO    | UNKNO      | UNKNO |          | UNKNO     | UNKNO     | UNKNO     | ENST0000   | 0589042.5  |
| UNKNO    | UNKNO      | UNKNO |          | UNKNO     | UNKNO     | UNKNO     | ENST0000   | p.V12774L  |
| UNKNO    | UNKNO      | UNKNO |          | UNKNO     | UNKNO     | UNKNO     | ENST0000   | p.C255F    |
| UNKNO    | UNKNO      | UNKNO |          | UNKNO     | UNKNO     | UNKNO     | ENST0000   | p.E1865K   |
| UNKNO    | UNKNO      | UNKNO |          | UNKNO     | UNKNO     | UNKNO     | ENST0000   | p.T1870M   |
| UNKNO    | UNKNO      | UNKNO |          | UNKNO     | UNKNO     | UNKNO     | ENST0000   | 0611641.1  |
| UNKNO    | UNKNO      | UNKNO |          | UNKNO     | UNKNO     | UNKNO     | ENST0000   | 0611641.1  |
| UNKNO    | UNKNO      | UNKNO |          | UNKNO     | UNKNO     | UNKNO     | ENST0000   | p.G266*    |
| UNKNO    | UNKNO      | UNKNO |          | UNKNO     | UNKNO     | UNKNO     | ENST0000   | p.R4615Q   |
| UNKNO    | UNKNO      | UNKNO |          | UNKNO     | UNKNO     | UNKNO     | ENST0000   | p.T790M    |
| UNKNO    | UNKNO      | UNKNO |          | UNKNO     | UNKNO     | UNKNO     | ENST0000   | p.L858R    |
| UNKNO    | UNKNO      | UNKNO |          | UNKNO     | UNKNO     | UNKNO     | ENST0000   | p.F270S    |
| UNKNO    | UNKNO      | UNKNO |          | UNKNO     | UNKNO     | UNKNO     | ENST0000   | 0589042.5  |
| UNKNO    | UNKNO      | UNKNO |          | UNKNO     | UNKNO     | UNKNO     | ENST0000   | p.K953R    |
| UNKNO    | UNKNO      | UNKNO |          | UNKNO     | UNKNO     | UNKNO     | ENST0000   | p.P2662L   |
| UNKNO    | UNKNO      | UNKNO |          | UNKNO     | UNKNO     | UNKNO     | ENST0000   | p.A997T    |
| UNKNO    | UNKNO      | UNKNO |          | UNKNO     | UNKNO     | UNKNO     | ENST0000   | p.S741R    |
| UNKNO    | UNKNO      | UNKNO |          | UNKNO     | UNKNO     | UNKNO     | ENST0000   | p.R2336H   |
| UNKNO    | UNKNO      | UNKNO |          | UNKNO     | UNKNO     | UNKNO     | ENST0000   | p.P47L     |
| UNKNO    | UNKNO      | UNKNO |          | UNKNO     | UNKNO     | UNKNO     | ENST0000   | p.A4345E   |
| UNKNO    | UNKNO      | UNKNO |          | UNKNO     | UNKNO     | UNKNO     | ENST0000   | p.R169H    |
| UNKNO    | UNKNO      | UNKNO |          | UNKNO     | UNKNO     | UNKNO     | ENST0000   | p.T1870M   |
| UNKNO    | UNKNO      | UNKNO |          | UNKNO     | UNKNO     | UNKNO     | ENST0000   | p.ELREA7   |
| UNKNO    | UNKNO      | UNKNO |          | UNKNO     | UNKNO     | UNKNO     | ENST0000   | p.R273H    |
| UNKNO    | UNKNO      | UNKNO |          | UNKNO     | UNKNO     | UNKNO     | ENST0000   | p.S7944L   |
| UNKNO    | UNKNO      | UNKNO |          | UNKNO     | UNKNO     | UNKNO     | ENST0000   | p.E1865K   |
| UNKNO    | UNKNO      | UNKNO |          | UNKNO     | UNKNO     | UNKNO     | ENST0000   | p.T1870M   |
| UNKNO    | UNKNO      | UNKNO |          | UNKNO     | UNKNO     | UNKNO     | ENST0000   | p.G6913D   |
| UNKNO    | UNKNO      | UNKNO |          | UNKNO     | UNKNO     | UNKNO     | ENST0000   | p.E6575D   |
| UNKNO    | UNKNO      | UNKNO |          | UNKNO     | UNKNO     | UNKNO     | ENST0000   | p.T6028N   |
| UNKNO    | UNKNO      | UNKNO |          | UNKNO     | UNKNO     | UNKNO     | ENST0000   | p.L3009S   |
| UNKNO    | UNKNO      | UNKNO |          | UNKNO     | UNKNO     | UNKNO     | ENST0000   | p.G682R    |
| UNKNO    | UNKNO      | UNKNO |          | UNKNO     | UNKNO     | UNKNO     | ENST0000   | p.G726E    |
| UNKNO    | UNKNO      | UNKNO |          | UNKNO     | UNKNO     | UNKNO     | ENST0000   | 0611641.1  |
| UNKNO    | UNKNO      | UNKNO |          | UNKNO     | UNKNO     | UNKNO     | ENST0000   | p.M237I    |
| UNKNO    | UNKNO      | UNKNO |          | UNKNO     | UNKNO     | UNKNO     | ENST0000   | p.R8388fs  |
| UNKNO    | UNKNO      | UNKNO |          | UNKNO     | UNKNO     | UNKNO     | ENST0000   | p.Q8387H   |
| UNKNO    | UNKNO      | UNKNO |          | UNKNO     | UNKNO     | UNKNO     | ENST0000   | p.L813R    |
| UNKNO    | UNKNO      | UNKNO |          | UNKNO     | UNKNO     | UNKNO     | ENST0000   | p.P2944L   |
| UNKNO    | UNKNO      | UNKNO |          | UNKNO     | UNKNO     | UNKNO     | ENST0000   | p.E633fs   |
| UNKNO    | UNKNO      | UNKNO |          | UNKNO     | UNKNO     | UNKNO     | ENST0000   | p.R248W    |
| UNKNO    | UNKNO      | UNKNO |          | UNKNO     | UNKNO     | UNKNO     | ENST0000   | p.A11845V  |
| UNKNO    | UNKNO      | UNKNO |          | UNKNO     | UNKNO     | UNKNO     | ENST0000   | p.V1643fs  |
| UNKNO    | UNKNO      | UNKNO |          | UNKNO     | UNKNO     | UNKNO     | ENST0000   | p.E3553K   |
| UNKNO    | UNKNO      | UNKNO |          | UNKNO     | UNKNO     | UNKNO     | ENST0000   | p.4953_49  |
| UNKNO    | UNKNO      | UNKNO |          | UNKNO     | UNKNO     | UNKNO     | ENST0000   | p.Q7146*   |
| UNKNO    | UNKNO      | UNKNO |          | UNKNO     | UNKNO     | UNKNO     | ENST0000   | p.C4133Y   |
| UNKNO    | UNKNO      | UNKNO |          | UNKNO     | UNKNO     | UNKNO     | ENST0000   | p.V4273fs  |
| UNKNO    | UNKNO      | UNKNO |          | UNKNO     | UNKNO     | UNKNO     | ENST0000   | p.S4272Y   |
| UNKNO    | UNKNO      | UNKNO |          | UNKNO     | UNKNO     | UNKNO     | ENST0000   | p.P31S     |
| UNKNO    | UNKNO      | UNKNO |          | UNKNO     | UNKNO     | UNKNO     | ENST0000   | 0611641.1  |

|       |         |       |       |       |                    |            |
|-------|---------|-------|-------|-------|--------------------|------------|
| UNKNO | UNKNOWN | UNKNO | UNKNO | UNKNO | ENST0000           | p.E2866fs  |
| UNKNO | UNKNOWN | UNKNO | UNKNO | UNKNO | ENST0000           | p.P2868T   |
| UNKNO | UNKNOWN | UNKNO | UNKNO | UNKNO | ENST0000           | p.E1693*   |
| UNKNO | UNKNOWN | UNKNO | UNKNO | UNKNO | ENST0000           | p.GSCGG    |
| UNKNO | UNKNOWN | UNKNO | UNKNO | UNKNO | ENST0000           | p.D1147fs  |
| UNKNO | UNKNOWN | UNKNO | UNKNO | UNKNO | ENST0000           | p.V1148I   |
| UNKNO | UNKNOWN | UNKNO | UNKNO | UNKNO | ENST0000           | p.E2212L   |
| UNKNO | UNKNOWN | UNKNO | UNKNO | UNKNO | ENST0000           | p.R4944C   |
| UNKNO | UNKNOWN | UNKNO | UNKNO | UNKNO | ENST0000           | p.L2316P   |
| UNKNO | UNKNOWN | UNKNO | UNKNO | UNKNO | ENST00000367255.9  |            |
| UNKNO | UNKNOWN | UNKNO | UNKNO | UNKNO | ENST00000356956.5  |            |
| UNKNO | UNKNOWN | UNKNO | UNKNO | UNKNO | ENST0000           | p.G2066C   |
| UNKNO | UNKNOWN | UNKNO | UNKNO | UNKNO | ENST0000           | p.G277S    |
| UNKNO | UNKNOWN | UNKNO | UNKNO | UNKNO | ENST00000262189.10 |            |
| UNKNO | UNKNOWN | UNKNO | UNKNO | UNKNO | ENST0000           | p.G838S    |
| UNKNO | UNKNOWN | UNKNO | UNKNO | UNKNO | ENST0000           | p.Q1953*   |
| UNKNO | UNKNOWN | UNKNO | UNKNO | UNKNO | ENST0000           | p.R248W    |
| UNKNO | UNKNOWN | UNKNO | UNKNO | UNKNO | ENST0000           | p.R14134G  |
| UNKNO | UNKNOWN | UNKNO | UNKNO | UNKNO | ENST00000611641.1  |            |
| UNKNO | UNKNOWN | UNKNO | UNKNO | UNKNO | ENST00000611641.1  |            |
| UNKNO | UNKNOWN | UNKNO | UNKNO | UNKNO | ENST0000           | p.R3243H   |
| UNKNO | UNKNOWN | UNKNO | UNKNO | UNKNO | ENST0000           | p.P8390fs  |
| UNKNO | UNKNOWN | UNKNO | UNKNO | UNKNO | ENST0000           | p.L33334fs |
| UNKNO | UNKNOWN | UNKNO | UNKNO | UNKNO | ENST00000611641.1  |            |
| UNKNO | UNKNOWN | UNKNO | UNKNO | UNKNO | ENST00000611641.1  |            |
| UNKNO | UNKNOWN | UNKNO | UNKNO | UNKNO | ENST0000           | p.A14356A  |
| UNKNO | UNKNOWN | UNKNO | UNKNO | UNKNO | ENST0000           | p.H1794Q   |
| UNKNO | UNKNOWN | UNKNO | UNKNO | UNKNO | ENST0000           | p.R60C     |
| UNKNO | UNKNOWN | UNKNO | UNKNO | UNKNO | ENST00000611641.1  |            |
| UNKNO | UNKNOWN | UNKNO | UNKNO | UNKNO | ENST0000           | p.W637R    |
| UNKNO | UNKNOWN | UNKNO | UNKNO | UNKNO | ENST0000           | p.A2079V   |
| UNKNO | UNKNOWN | UNKNO | UNKNO | UNKNO | ENST0000           | p.E15807K  |
| UNKNO | UNKNOWN | UNKNO | UNKNO | UNKNO | ENST0000           | p.R3507*   |
| UNKNO | UNKNOWN | UNKNO | UNKNO | UNKNO | ENST0000           | p.GSCGG    |
| UNKNO | UNKNOWN | UNKNO | UNKNO | UNKNO | ENST0000           | p.E286*    |
| UNKNO | UNKNOWN | UNKNO | UNKNO | UNKNO | ENST0000           | p.S106fs   |
| UNKNO | UNKNOWN | UNKNO | UNKNO | UNKNO | ENST0000           | p.R3073H   |
| UNKNO | UNKNOWN | UNKNO | UNKNO | UNKNO | ENST0000           | p.A3058V   |
| UNKNO | UNKNOWN | UNKNO | UNKNO | UNKNO | ENST0000           | p.RGSCGG   |
| UNKNO | UNKNOWN | UNKNO | UNKNO | UNKNO | ENST0000           | p.A4787T   |
| UNKNO | UNKNOWN | UNKNO | UNKNO | UNKNO | ENST0000           | p.G964R    |
| UNKNO | UNKNOWN | UNKNO | UNKNO | UNKNO | ENST0000           | p.P8884de  |
| UNKNO | UNKNOWN | UNKNO | UNKNO | UNKNO | ENST0000           | p.VAAAAA   |
| UNKNO | UNKNOWN | UNKNO | UNKNO | UNKNO | ENST00000611641.1  |            |
| UNKNO | UNKNOWN | UNKNO | UNKNO | UNKNO | ENST0000           | p.RGSCGG   |
| UNKNO | UNKNOWN | UNKNO | UNKNO | UNKNO | ENST0000           | p.Q1728*   |
| UNKNO | UNKNOWN | UNKNO | UNKNO | UNKNO | ENST0000           | p.G3782R   |
| UNKNO | UNKNOWN | UNKNO | UNKNO | UNKNO | ENST0000           | p.N235fs   |
| UNKNO | UNKNOWN | UNKNO | UNKNO | UNKNO | ENST0000           | p.N235fs   |
| UNKNO | UNKNOWN | UNKNO | UNKNO | UNKNO | ENST0000           | p.LREAT70  |
| UNKNO | UNKNOWN | UNKNO | UNKNO | UNKNO | ENST0000           | p.R5442G   |
| UNKNO | UNKNOWN | UNKNO | UNKNO | UNKNO | ENST0000           | p.ELREA70  |
| UNKNO | UNKNOWN | UNKNO | UNKNO | UNKNO | ENST0000           | p.T745M    |
| UNKNO | UNKNOWN | UNKNO | UNKNO | UNKNO | ENST0000           | p.CGSCGG   |
| UNKNO | UNKNOWN | UNKNO | UNKNO | UNKNO | ENST0000           | p.W380*    |
| UNKNO | UNKNOWN | UNKNO | UNKNO | UNKNO | ENST00000611641.1  |            |
| UNKNO | UNKNOWN | UNKNO | UNKNO | UNKNO | ENST0000           | p.K679Q    |
| UNKNO | UNKNOWN | UNKNO | UNKNO | UNKNO | ENST0000           | p.G908C    |
| UNKNO | UNKNOWN | UNKNO | UNKNO | UNKNO | ENST0000           | p.A708fs   |
| UNKNO | UNKNOWN | UNKNO | UNKNO | UNKNO | ENST0000           | p.L813R    |

|       |         |       |       |       |          |           |
|-------|---------|-------|-------|-------|----------|-----------|
| UNKNO | UNKNOWN | UNKNO | UNKNO | UNKNO | ENST0000 | p.A1913de |
| UNKNO | UNKNOWN | UNKNO | UNKNO | UNKNO | ENST0000 | p.R4615Q  |
| UNKNO | UNKNOWN | UNKNO | UNKNO | UNKNO | ENST0000 | p.C3944Y  |
| UNKNO | UNKNOWN | UNKNO | UNKNO | UNKNO | ENST0000 | p.L813R   |
| UNKNO | UNKNOWN | UNKNO | UNKNO | UNKNO | ENST0000 | p.ACSP21  |
| UNKNO | UNKNOWN | UNKNO | UNKNO | UNKNO | ENST0000 | p.F270S   |
| UNKNO | UNKNOWN | UNKNO | UNKNO | UNKNO | ENST0000 | p.P13465L |
| UNKNO | UNKNOWN | UNKNO | UNKNO | UNKNO | ENST0000 | p.E701fs  |
| UNKNO | UNKNOWN | UNKNO | UNKNO | UNKNO | ENST0000 | p.L702fs  |
| UNKNO | UNKNOWN | UNKNO | UNKNO | UNKNO | ENST0000 | p.R337C   |
| UNKNO | UNKNOWN | UNKNO | UNKNO | UNKNO | ENST0000 | p.Q810K   |
| UNKNO | UNKNOWN | UNKNO | UNKNO | UNKNO | ENST0000 | p.S27677L |
| UNKNO | UNKNOWN | UNKNO | UNKNO | UNKNO | ENST0000 | p.V21605L |
| UNKNO | UNKNOWN | UNKNO | UNKNO | UNKNO | ENST0000 | p.E11026K |
| UNKNO | UNKNOWN | UNKNO | UNKNO | UNKNO | ENST0000 | p.A11018E |
| UNKNO | UNKNOWN | UNKNO | UNKNO | UNKNO | ENST0000 | p.E3458K  |
| UNKNO | UNKNOWN | UNKNO | UNKNO | UNKNO | ENST0000 | p.G3455D  |
| UNKNO | UNKNOWN | UNKNO | UNKNO | UNKNO | ENST0000 | p.R17H    |
| UNKNO | UNKNOWN | UNKNO | UNKNO | UNKNO | ENST0000 | 0611641.1 |
| UNKNO | UNKNOWN | UNKNO | UNKNO | UNKNO | ENST0000 | p.L1536F  |
| UNKNO | UNKNOWN | UNKNO | UNKNO | UNKNO | ENST0000 | p.R826*   |
| UNKNO | UNKNOWN | UNKNO | UNKNO | UNKNO | ENST0000 | p.D1091fs |
| UNKNO | UNKNOWN | UNKNO | UNKNO | UNKNO | ENST0000 | p.E22499K |
| UNKNO | UNKNOWN | UNKNO | UNKNO | UNKNO | ENST0000 | p.A673V   |
| UNKNO | UNKNOWN | UNKNO | UNKNO | UNKNO | ENST0000 | p.L813R   |
| UNKNO | UNKNOWN | UNKNO | UNKNO | UNKNO | ENST0000 | p.P5065S  |
| UNKNO | UNKNOWN | UNKNO | UNKNO | UNKNO | ENST0000 | p.T4232M  |
| UNKNO | UNKNOWN | UNKNO | UNKNO | UNKNO | ENST0000 | p.P2757T  |
| UNKNO | UNKNOWN | UNKNO | UNKNO | UNKNO | ENST0000 | p.R2043W  |
| UNKNO | UNKNOWN | UNKNO | UNKNO | UNKNO | ENST0000 | p.R1140L  |
| UNKNO | UNKNOWN | UNKNO | UNKNO | UNKNO | ENST0000 | p.S6434C  |
| UNKNO | UNKNOWN | UNKNO | UNKNO | UNKNO | ENST0000 | p.A1255T  |
| UNKNO | UNKNOWN | UNKNO | UNKNO | UNKNO | ENST0000 | p.S800L   |
| UNKNO | UNKNOWN | UNKNO | UNKNO | UNKNO | ENST0000 | p.L8304I  |
| UNKNO | UNKNOWN | UNKNO | UNKNO | UNKNO | ENST0000 | p.P1526L  |
| UNKNO | UNKNOWN | UNKNO | UNKNO | UNKNO | ENST0000 | p.R14199C |
| UNKNO | UNKNOWN | UNKNO | UNKNO | UNKNO | ENST0000 | p.R744H   |
| UNKNO | UNKNOWN | UNKNO | UNKNO | UNKNO | ENST0000 | p.E2085K  |
| UNKNO | UNKNOWN | UNKNO | UNKNO | UNKNO | ENST0000 | p.H193L   |
| UNKNO | UNKNOWN | UNKNO | UNKNO | UNKNO | ENST0000 | p.E2830K  |
| UNKNO | UNKNOWN | UNKNO | UNKNO | UNKNO | ENST0000 | p.D5692N  |
| UNKNO | UNKNOWN | UNKNO | UNKNO | UNKNO | ENST0000 | p.Q3462K  |
| UNKNO | UNKNOWN | UNKNO | UNKNO | UNKNO | ENST0000 | p.G30829C |
| UNKNO | UNKNOWN | UNKNO | UNKNO | UNKNO | ENST0000 | p.A2495S  |
| UNKNO | UNKNOWN | UNKNO | UNKNO | UNKNO | ENST0000 | p.2718 27 |
| UNKNO | UNKNOWN | UNKNO | UNKNO | UNKNO | ENST0000 | p.G159W   |
| UNKNO | UNKNOWN | UNKNO | UNKNO | UNKNO | ENST0000 | p.P12385H |
| UNKNO | UNKNOWN | UNKNO | UNKNO | UNKNO | ENST0000 | p.G4479W  |
| UNKNO | UNKNOWN | UNKNO | UNKNO | UNKNO | ENST0000 | p.P3578H  |
| UNKNO | UNKNOWN | UNKNO | UNKNO | UNKNO | ENST0000 | p.E3777*  |
| UNKNO | UNKNOWN | UNKNO | UNKNO | UNKNO | ENST0000 | p.R7887M  |
| UNKNO | UNKNOWN | UNKNO | UNKNO | UNKNO | ENST0000 | p.Q8163H  |
| UNKNO | UNKNOWN | UNKNO | UNKNO | UNKNO | ENST0000 | p.P8361H  |
| UNKNO | UNKNOWN | UNKNO | UNKNO | UNKNO | ENST0000 | p.Q7516K  |
| UNKNO | UNKNOWN | UNKNO | UNKNO | UNKNO | ENST0000 | p.L30788I |
| UNKNO | UNKNOWN | UNKNO | UNKNO | UNKNO | ENST0000 | p.P9453T  |
| UNKNO | UNKNOWN | UNKNO | UNKNO | UNKNO | ENST0000 | p.Q453H   |
| UNKNO | UNKNOWN | UNKNO | UNKNO | UNKNO | ENST0000 | p.Q2579K  |
| UNKNO | UNKNOWN | UNKNO | UNKNO | UNKNO | ENST0000 | p.P4Q     |
| UNKNO | UNKNOWN | UNKNO | UNKNO | UNKNO | ENST0000 | p.P2770H  |

|       |         |       |       |       |          |            |
|-------|---------|-------|-------|-------|----------|------------|
| UNKNO | UNKNOWN | UNKNO | UNKNO | UNKNO | ENST0000 | p.G22W     |
| UNKNO | UNKNOWN | UNKNO | UNKNO | UNKNO | ENST0000 | p.H3592N   |
| UNKNO | UNKNOWN | UNKNO | UNKNO | UNKNO | ENST0000 | p.P2044T   |
| UNKNO | UNKNOWN | UNKNO | UNKNO | UNKNO | ENST0000 | p.L657I    |
| UNKNO | UNKNOWN | UNKNO | UNKNO | UNKNO | ENST0000 | p.P3877T   |
| UNKNO | UNKNOWN | UNKNO | UNKNO | UNKNO | ENST0000 | p.W2819L   |
| UNKNO | UNKNOWN | UNKNO | UNKNO | UNKNO | ENST0000 | p.L29732I  |
| UNKNO | UNKNOWN | UNKNO | UNKNO | UNKNO | ENST0000 | p.P2947T   |
| UNKNO | UNKNOWN | UNKNO | UNKNO | UNKNO | ENST0000 | p.P2939Q   |
| UNKNO | UNKNOWN | UNKNO | UNKNO | UNKNO | ENST0000 | p.Q2658K   |
| UNKNO | UNKNOWN | UNKNO | UNKNO | UNKNO | ENST0000 | p.G973C    |
| UNKNO | UNKNOWN | UNKNO | UNKNO | UNKNO | ENST0000 | p.T13161T  |
| UNKNO | UNKNOWN | UNKNO | UNKNO | UNKNO | ENST0000 | p.L6655M   |
| UNKNO | UNKNOWN | UNKNO | UNKNO | UNKNO | ENST0000 | p.L2977L   |
| UNKNO | UNKNOWN | UNKNO | UNKNO | UNKNO | ENST0000 | p.H1794Q   |
| UNKNO | UNKNOWN | UNKNO | UNKNO | UNKNO | ENST0000 | p.I31909T  |
| UNKNO | UNKNOWN | UNKNO | UNKNO | UNKNO | ENST0000 | p.K17844N  |
| UNKNO | UNKNOWN | UNKNO | UNKNO | UNKNO | ENST0000 | p.S2703R   |
| UNKNO | UNKNOWN | UNKNO | UNKNO | UNKNO | ENST0000 | p.P13049T  |
| UNKNO | UNKNOWN | UNKNO | UNKNO | UNKNO | ENST0000 | p.R605K    |
| UNKNO | UNKNOWN | UNKNO | UNKNO | UNKNO | ENST0000 | p.R56Q     |
| UNKNO | UNKNOWN | UNKNO | UNKNO | UNKNO | ENST0000 | p.E475G    |
| UNKNO | UNKNOWN | UNKNO | UNKNO | UNKNO | ENST0000 | p.V173E    |
| UNKNO | UNKNOWN | UNKNO | UNKNO | UNKNO | ENST0000 | p.Y14297F  |
| UNKNO | UNKNOWN | UNKNO | UNKNO | UNKNO | ENST0000 | p.E4911*   |
| UNKNO | UNKNOWN | UNKNO | UNKNO | UNKNO | ENST0000 | p.F438L    |
| UNKNO | UNKNOWN | UNKNO | UNKNO | UNKNO | ENST0000 | p.N3022S   |
| UNKNO | UNKNOWN | UNKNO | UNKNO | UNKNO | ENST0000 | p.F5408L   |
| UNKNO | UNKNOWN | UNKNO | UNKNO | UNKNO | ENST0000 | p.D2461E   |
| UNKNO | UNKNOWN | UNKNO | UNKNO | UNKNO | ENST0000 | p.R32513S  |
| UNKNO | UNKNOWN | UNKNO | UNKNO | UNKNO | ENST0000 | p.E27668fs |
| UNKNO | UNKNOWN | UNKNO | UNKNO | UNKNO | ENST0000 | p.V26281I  |
| UNKNO | UNKNOWN | UNKNO | UNKNO | UNKNO | ENST0000 | p.E23849*  |
| UNKNO | UNKNOWN | UNKNO | UNKNO | UNKNO | ENST0000 | p.P21318T  |
| UNKNO | UNKNOWN | UNKNO | UNKNO | UNKNO | ENST0000 | p.R20215M  |
| UNKNO | UNKNOWN | UNKNO | UNKNO | UNKNO | ENST0000 | p.D19431H  |
| UNKNO | UNKNOWN | UNKNO | UNKNO | UNKNO | ENST0000 | p.L16278I  |
| UNKNO | UNKNOWN | UNKNO | UNKNO | UNKNO | ENST0000 | p.D15067Y  |
| UNKNO | UNKNOWN | UNKNO | UNKNO | UNKNO | ENST0000 | p.V12150I  |
| UNKNO | UNKNOWN | UNKNO | UNKNO | UNKNO | ENST0000 | p.R11199M  |
| UNKNO | UNKNOWN | UNKNO | UNKNO | UNKNO | ENST0000 | p.P11064H  |
| UNKNO | UNKNOWN | UNKNO | UNKNO | UNKNO | ENST0000 | p.V8258M   |
| UNKNO | UNKNOWN | UNKNO | UNKNO | UNKNO | ENST0000 | p.E6968*   |
| UNKNO | UNKNOWN | UNKNO | UNKNO | UNKNO | ENST0000 | p.E4056K   |
| UNKNO | UNKNOWN | UNKNO | UNKNO | UNKNO | ENST0000 | p.L1751F   |
| UNKNO | UNKNOWN | UNKNO | UNKNO | UNKNO | ENST0000 | p.G1819C   |
| UNKNO | UNKNOWN | UNKNO | UNKNO | UNKNO | ENST0000 | p.A1665V   |
| UNKNO | UNKNOWN | UNKNO | UNKNO | UNKNO | ENST0000 | p.H1976L   |
| UNKNO | UNKNOWN | UNKNO | UNKNO | UNKNO | ENST0000 | p.G1071fs  |
| UNKNO | UNKNOWN | UNKNO | UNKNO | UNKNO | ENST0000 | p.R110L    |
| UNKNO | UNKNOWN | UNKNO | UNKNO | UNKNO | ENST0000 | p.R4078M   |
| UNKNO | UNKNOWN | UNKNO | UNKNO | UNKNO | ENST0000 | p.F2998fs  |
| UNKNO | UNKNOWN | UNKNO | UNKNO | UNKNO | ENST0000 | p.W91*     |
| UNKNO | UNKNOWN | UNKNO | UNKNO | UNKNO | ENST0000 | p.E2550K   |
| UNKNO | UNKNOWN | UNKNO | UNKNO | UNKNO | ENST0000 | p.G838S    |
| UNKNO | UNKNOWN | UNKNO | UNKNO | UNKNO | ENST0000 | p.E502*    |
| UNKNO | UNKNOWN | UNKNO | UNKNO | UNKNO | ENST0000 | p.T12726A  |
| UNKNO | UNKNOWN | UNKNO | UNKNO | UNKNO | ENST0000 | p.S10111I  |
| UNKNO | UNKNOWN | UNKNO | UNKNO | UNKNO | ENST0000 | p.ELREA7   |
| UNKNO | UNKNOWN | UNKNO | UNKNO | UNKNO | ENST0000 | p.C5023Y   |

|       |         |       |       |       |          |           |
|-------|---------|-------|-------|-------|----------|-----------|
| UNKNO | UNKNOWN | UNKNO | UNKNO | UNKNO | ENST0000 | p.A878V   |
| UNKNO | UNKNOWN | UNKNO | UNKNO | UNKNO | ENST0000 | p.H2529Q  |
| UNKNO | UNKNOWN | UNKNO | UNKNO | UNKNO | ENST0000 | p.S1297Y  |
| UNKNO | UNKNOWN | UNKNO | UNKNO | UNKNO | ENST0000 | p.V6724L  |
| UNKNO | UNKNOWN | UNKNO | UNKNO | UNKNO | ENST0000 | p.T20845M |
| UNKNO | UNKNOWN | UNKNO | UNKNO | UNKNO | ENST0000 | p.G2092*  |
| UNKNO | UNKNOWN | UNKNO | UNKNO | UNKNO | ENST0000 | p.E2076*  |
| UNKNO | UNKNOWN | UNKNO | UNKNO | UNKNO | ENST0000 | p.G4397V  |
| UNKNO | UNKNOWN | UNKNO | UNKNO | UNKNO | ENST0000 | p.E7337*  |
| UNKNO | UNKNOWN | UNKNO | UNKNO | UNKNO | ENST0000 | p.Q6164P  |
| UNKNO | UNKNOWN | UNKNO | UNKNO | UNKNO | ENST0000 | p.S2303I  |
| UNKNO | UNKNOWN | UNKNO | UNKNO | UNKNO | ENST0000 | p.C983F   |
| UNKNO | UNKNOWN | UNKNO | UNKNO | UNKNO | ENST0000 | p.G1526R  |
| UNKNO | UNKNOWN | UNKNO | UNKNO | UNKNO | ENST0000 | p.R280G   |
| UNKNO | UNKNOWN | UNKNO | UNKNO | UNKNO | ENST0000 | p.V8083A  |
| UNKNO | UNKNOWN | UNKNO | UNKNO | UNKNO | ENST0000 | p.L2159I  |
| UNKNO | UNKNOWN | UNKNO | UNKNO | UNKNO | ENST0000 | p.F1762L  |
| UNKNO | UNKNOWN | UNKNO | UNKNO | UNKNO | ENST0000 | p.Y2168D  |
| UNKNO | UNKNOWN | UNKNO | UNKNO | UNKNO | ENST0000 | p.P13936S |
| UNKNO | UNKNOWN | UNKNO | UNKNO | UNKNO | ENST0000 | p.P10982S |
| UNKNO | UNKNOWN | UNKNO | UNKNO | UNKNO | ENST0000 | p.P10465S |
| UNKNO | UNKNOWN | UNKNO | UNKNO | UNKNO | ENST0000 | p.Q2025*  |
| UNKNO | UNKNOWN | UNKNO | UNKNO | UNKNO | ENST0000 | p.S3443N  |
| UNKNO | UNKNOWN | UNKNO | UNKNO | UNKNO | ENST0000 | 0455089.5 |
| UNKNO | UNKNOWN | UNKNO | UNKNO | UNKNO | ENST0000 | p.Q1736E  |
| UNKNO | UNKNOWN | UNKNO | UNKNO | UNKNO | ENST0000 | p.G1465S  |
| UNKNO | UNKNOWN | UNKNO | UNKNO | UNKNO | ENST0000 | p.T2334A  |
| UNKNO | UNKNOWN | UNKNO | UNKNO | UNKNO | ENST0000 | p.V14234I |
| UNKNO | UNKNOWN | UNKNO | UNKNO | UNKNO | ENST0000 | p.S5944Y  |
| UNKNO | UNKNOWN | UNKNO | UNKNO | UNKNO | ENST0000 | p.S1293L  |
| UNKNO | UNKNOWN | UNKNO | UNKNO | UNKNO | ENST0000 | p.E1154K  |
| UNKNO | UNKNOWN | UNKNO | UNKNO | UNKNO | ENST0000 | p.R2450K  |
| UNKNO | UNKNOWN | UNKNO | UNKNO | UNKNO | ENST0000 | p.R2450K  |
| UNKNO | UNKNOWN | UNKNO | UNKNO | UNKNO | ENST0000 | p.R2450K  |
| UNKNO | UNKNOWN | UNKNO | UNKNO | UNKNO | ENST0000 | p.R2450K  |
| UNKNO | UNKNOWN | UNKNO | UNKNO | UNKNO | ENST0000 | p.E718D   |
| UNKNO | UNKNOWN | UNKNO | UNKNO | UNKNO | ENST0000 | p.E718D   |
| UNKNO | UNKNOWN | UNKNO | UNKNO | UNKNO | ENST0000 | p.E718D   |
| UNKNO | UNKNOWN | UNKNO | UNKNO | UNKNO | ENST0000 | *1372*    |





|          |          |        |          |                       |          |          |          |             |
|----------|----------|--------|----------|-----------------------|----------|----------|----------|-------------|
| NM_00603 | NP_00602 | O95613 | PCNT_HU  | pericentrin           | U52962   | HGNC:160 | Approved | gene with p |
| NM_00603 | NP_00602 | O95613 | PCNT_HU  | pericentrin           | U52962   | HGNC:160 | Approved | gene with p |
| NM_20138 | NP_95878 | Q15149 | PLEC_HU  | plectin               | Z54367   | HGNC:906 | Approved | gene with p |
| NM_02104 | NP_06638 | O75690 | KRA58_HU | keratin ass           | AY360461 | HGNC:236 | Approved | gene with p |
| NM_00603 | NP_00602 | O95613 | PCNT_HU  | pericentrin           | U52962   | HGNC:160 | Approved | gene with p |
| NM_00603 | NP_00602 | O95613 | PCNT_HU  | pericentrin           | U52962   | HGNC:160 | Approved | gene with p |
| NM_00201 | NP_00200 | P20930 | FILA_HUM | filaggrin             | M24355   | HGNC:374 | Approved | gene with p |
|          |          | P20929 | NEBU_HU  | nebulin               | X83957   | HGNC:772 | Approved | gene with p |
| NM_02458 | NP_07885 | Q6V017 | FAT4_HUN | FAT atypic            | AY356402 | HGNC:231 | Approved | gene with p |
| NM_18296 | NP_89200 | Q8NF91 | SYNE1_HU | spectrin re           | KF458330 | HGNC:170 | Approved | gene with p |
| NM_00087 | NP_00086 | P11717 | MPRI_HU  | insulin like          | Y00285   | HGNC:546 | Approved | gene with p |
| NM_00087 | NP_00086 | P11717 | MPRI_HU  | insulin like          | Y00285   | HGNC:546 | Approved | gene with p |
| NM_00134 | NP_00133 | P00533 | EGFR_HU  | epidermal             | KF458469 | HGNC:323 | Approved | gene with p |
| NM_17060 | NP_73375 | Q8NEZ4 | KMT2C_HU | lysine met            | AY024361 | HGNC:137 | Approved | gene with p |
| NM_17060 | NP_73375 | Q8NEZ4 | KMT2C_HU | lysine met            | AY024361 | HGNC:137 | Approved | gene with p |
| NM_20138 | NP_95878 | Q15149 | PLEC_HU  | plectin               | Z54367   | HGNC:906 | Approved | gene with p |
| NM_00127 | NP_00126 | P04637 | P53_HUM  | tumor prote           | X60020   | HGNC:119 | Approved | gene with p |
|          |          |        |          |                       |          |          |          |             |
|          |          |        |          |                       |          |          |          |             |
|          |          |        |          |                       |          |          |          |             |
| NM_00127 | NP_00125 | Q5VST9 | OBSCN_H  | obscurin, c           | AL670729 | HGNC:157 | Approved | gene with p |
| NM_13337 | NP_59686 | Q8WZ42 | TITIN_HU | titin                 | X98115   | HGNC:124 | Approved | gene with p |
|          |          |        |          |                       |          |          |          |             |
|          |          |        |          |                       |          |          |          |             |
| NM_00201 | NP_00200 | P20930 | FILA_HUM | filaggrin             | M24355   | HGNC:374 | Approved | gene with p |
| NM_02104 | NP_06638 | O75690 | KRA58_HU | keratin ass           | AY360461 | HGNC:236 | Approved | gene with p |
|          |          |        |          |                       |          |          |          |             |
| NM_00201 | NP_00200 | P20930 | FILA_HUM | filaggrin             | M24355   | HGNC:374 | Approved | gene with p |
| NM_20138 | NP_95878 | Q15149 | PLEC_HU  | plectin               | Z54367   | HGNC:906 | Approved | gene with p |
| NM_13337 | NP_59686 | Q8WZ42 | TITIN_HU | titin                 | X98115   | HGNC:124 | Approved | gene with p |
| NM_17060 | NP_73375 | Q8NEZ4 | KMT2C_HU | lysine met            | AY024361 | HGNC:137 | Approved | gene with p |
| NM_02104 | NP_06638 | O75690 | KRA58_HU | keratin ass           | AY360461 | HGNC:236 | Approved | gene with p |
| NM_00127 | NP_00126 | P04637 | P53_HUM  | tumor prote           | X60020   | HGNC:119 | Approved | gene with p |
| NM_00127 | NP_00126 | P04637 | P53_HUM  | tumor prote           | X60020   | HGNC:119 | Approved | gene with p |
| NM_00054 | NP_00053 | P21817 | RYR1_HU  | ryanodine             | U48508   | HGNC:104 | Approved | gene with p |
| NM_01522 | NP_05604 | Q8WUY3 | PRUN2_HU | prune hom             | BC022571 | HGNC:252 | Approved | gene with p |
| NM_02104 | NP_06638 | O75690 | KRA58_HU | keratin ass           | AY360461 | HGNC:236 | Approved | gene with p |
| NM_02469 | NP_07896 | Q8WXI7 | MUC16_HU | mucin 16, c           | KF456494 | HGNC:155 | Approved | gene with p |
| NM_00201 | NP_00200 | P20930 | FILA_HUM | filaggrin             | M24355   | HGNC:374 | Approved | gene with p |
| NM_00127 | NP_00125 | Q5VST9 | OBSCN_H  | obscurin, c           | AL670729 | HGNC:157 | Approved | gene with p |
| 777del   |          | Q15911 | ZFHX3_HU | zinc finger homeobox  |          | HGNC:777 | Approved | gene with p |
|          |          |        |          |                       |          |          |          |             |
| NM_02104 | NP_06638 | O75690 | KRA58_HU | keratin ass           | AY360461 | HGNC:236 | Approved | gene with p |
|          |          | Q15911 | ZFHX3_HU | zinc finger homeobox  |          | HGNC:777 | Approved | gene with p |
| NM_00201 | NP_00200 | P20930 | FILA_HUM | filaggrin             | M24355   | HGNC:374 | Approved | gene with p |
| NM_00127 | NP_00126 | P04637 | P53_HUM  | tumor prote           | X60020   | HGNC:119 | Approved | gene with p |
| NM_00127 | NP_00126 | P04637 | P53_HUM  | tumor prote           | X60020   | HGNC:119 | Approved | gene with p |
| NM_00134 | NP_00133 | P00533 | EGFR_HU  | epidermal             | KF458469 | HGNC:323 | Approved | gene with p |
| NM_13337 | NP_59686 | Q8WZ42 | TITIN_HU | titin                 | X98115   | HGNC:124 | Approved | gene with p |
| NM_00134 | NP_00133 | P00533 | EGFR_HU  | epidermal             | KF458469 | HGNC:323 | Approved | gene with p |
| NM_00134 | NP_00133 | P00533 | EGFR_HU  | epidermal             | KF458469 | HGNC:323 | Approved | gene with p |
| NM_02104 | NP_06638 | O75690 | KRA58_HU | keratin ass           | AY360461 | HGNC:236 | Approved | gene with p |
| NM_19946 | NP_95563 | Q13936 | CAC1C_HU | calcium voltage-gated |          | HGNC:139 | Approved | gene with p |
|          |          |        |          |                       |          |          |          |             |
| NM_00201 | NP_00200 | P20930 | FILA_HUM | filaggrin             | M24355   | HGNC:374 | Approved | gene with p |
| NM_17060 | NP_73375 | Q8NEZ4 | KMT2C_HU | lysine met            | AY024361 | HGNC:137 | Approved | gene with p |
|          |          | Q96JG9 | ZN469_HU | zinc finger           | KF456226 | HGNC:232 | Approved | gene with p |
| NM_00134 | NP_00133 | P00533 | EGFR_HU  | epidermal             | KF458469 | HGNC:323 | Approved | gene with p |





















|           |                  |           |            |            |             |            |           |         |
|-----------|------------------|-----------|------------|------------|-------------|------------|-----------|---------|
| AB007862  | ENSG00008812505  | 9         | NM_006031  |            |             |            | CCDS3359  | OTTHUMG |
| AB007862  | ENSG00008812505  | 9         | NM_006031  |            |             |            | CCDS3359  | OTTHUMG |
| U53204    | ENSG00008633055  | 8         | NM_00044   | 939        | Plakins     |            | CCDS4376  | OTTHUMG |
| AB126077  | ENSG000015144888 | NM_02104  |            | 619        | Keratin ass |            | CCDS4168  | OTTHUMG |
| AB007862  | ENSG00008812505  | 9         | NM_006031  |            |             |            | CCDS3359  | OTTHUMG |
| AB007862  | ENSG00008812505  | 9         | NM_006031  |            |             |            | CCDS3359  | OTTHUMG |
| XM_048104 | ENSG00002740331  | 2         | NM_00201   | 1350 863   | S100 fusec  |            | CCDS3086  | OTTHUMG |
| X83957    | ENSG000010051637 | NM_004543 |            |            |             |            | CCDS4642  | OTTHUMG |
| AY356402  | ENSG000015003449 | NM_02458  |            | 24         | Cadherin re |            | CCDS3732  | OTTHUMG |
| AB018339  | ENSG00009872452  | 1         | NM_18296   | 1252       | Spectrin re |            | CCDS5235  | OTTHUMG |
| J03528    | ENSG00000197081  | NM_00087  | 471 1233   |            | CD molecu   |            | CCDS5273  | OTTHUMG |
| J03528    | ENSG00000197081  | NM_00087  | 471 1233   |            | CD molecu   |            | CCDS5273  | OTTHUMG |
|           | ENSG00001505215  | NM_00522  |            | 1096       | Erb-b2 rec  |            | CCDS5514  | OTTHUMG |
| AF264750  | ENSG000010819331 |           |            | 88 1399 48 | PHD finger  |            | CCDS5931  | OTTHUMG |
| AF264750  | ENSG000010819331 |           |            | 88 1399 48 | PHD finger  |            | CCDS5931  | OTTHUMG |
| U53204    | ENSG00008633055  | 8         | NM_00044   | 939        | Plakins     |            | CCDS4376  | OTTHUMG |
| AF307851  | ENSG00006396087  | 3         | NM_000546  |            |             |            | CCDS1111  | OTTHUMG |
|           |                  |           |            |            |             |            |           |         |
|           |                  |           |            |            |             |            |           |         |
|           |                  |           |            |            |             |            |           |         |
| AJ002535  | ENSG000011448995 | NM_05284  | 555 722 59 |            | Fibronectin |            | CCDS1570  | OTTHUMG |
| X90568    | ENSG00002129545  | 1         | NM_13337   | 555 593 59 | Fibronectin |            | CCDS5442  | OTTHUMG |
|           |                  |           |            |            |             |            |           |         |
|           |                  |           |            |            |             |            |           |         |
| XM_048104 | ENSG00002740331  | 2         | NM_00201   | 1350 863   | S100 fusec  |            | CCDS3086  | OTTHUMG |
| AB126077  | ENSG000015144888 | NM_02104  |            | 619        | Keratin ass |            | CCDS4168  | OTTHUMG |
|           |                  |           |            |            |             |            |           |         |
| XM_048104 | ENSG00002740331  | 2         | NM_00201   | 1350 863   | S100 fusec  |            | CCDS3086  | OTTHUMG |
| U53204    | ENSG00008633055  | 8         | NM_00044   | 939        | Plakins     |            | CCDS4376  | OTTHUMG |
| X90568    | ENSG00002129545  | 1         | NM_13337   | 555 593 59 | Fibronectin |            | CCDS5442  | OTTHUMG |
| AF264750  | ENSG000010819331 |           |            | 88 1399 48 | PHD finger  |            | CCDS5931  | OTTHUMG |
| AB126077  | ENSG000015144888 | NM_02104  |            | 619        | Keratin ass |            | CCDS4168  | OTTHUMG |
| AF307851  | ENSG00006396087  | 3         | NM_000546  |            |             |            | CCDS1111  | OTTHUMG |
| AF307851  | ENSG00006396087  | 3         | NM_000546  |            |             |            | CCDS1111  | OTTHUMG |
| J05200    | ENSG00001862346  | 16621918  |            | 287 694    | Ryanodine   |            | CCDS3301  | OTTHUMG |
| BC019095  | ENSG000016288218 | NM_13881  |            | 1299       | BCH doma    |            | CCDS4798  | OTTHUMG |
| AB126077  | ENSG000015144888 | NM_02104  |            | 619        | Keratin ass |            | CCDS4168  | OTTHUMG |
| AF414442  |                  | 11369781  | NM_02469   |            | 648         | Mucins     | CCDS54212 |         |
| XM_048104 | ENSG00002740331  | 2         | NM_00201   | 1350 863   | S100 fusec  |            | CCDS3086  | OTTHUMG |
| AJ002535  | ENSG000011448995 | NM_05284  | 555 722 59 |            | Fibronectin |            | CCDS1570  | OTTHUMG |
| D10250    | ENSG00001719379  | 7         | NM_00688   | 529 28     | ZF class hc |            | CCDS1090  | OTTHUMG |
|           |                  |           |            |            |             |            |           |         |
| AB126077  | ENSG000015144888 | NM_02104  |            | 619        | Keratin ass |            | CCDS4168  | OTTHUMG |
| D10250    | ENSG00001719379  | 7         | NM_00688   | 529 28     | ZF class hc |            | CCDS1090  | OTTHUMG |
| XM_048104 | ENSG00002740331  | 2         | NM_00201   | 1350 863   | S100 fusec  |            | CCDS3086  | OTTHUMG |
| AF307851  | ENSG00006396087  | 3         | NM_000546  |            |             |            | CCDS1111  | OTTHUMG |
| AF307851  | ENSG00006396087  | 3         | NM_000546  |            |             |            | CCDS1111  | OTTHUMG |
|           | ENSG00001505215  | NM_00522  |            | 1096       | Erb-b2 rec  |            | CCDS5514  | OTTHUMG |
| X90568    | ENSG00002129545  | 1         | NM_13337   | 555 593 59 | Fibronectin |            | CCDS5442  | OTTHUMG |
|           | ENSG00001505215  | NM_00522  |            | 1096       | Erb-b2 rec  |            | CCDS5514  | OTTHUMG |
|           | ENSG00001505215  | NM_00522  |            | 1096       | Erb-b2 rec  |            | CCDS5514  | OTTHUMG |
| AB126077  | ENSG000015144888 | NM_02104  |            | 619        | Keratin ass |            | CCDS4168  | OTTHUMG |
| AF070589  | ENSG00001650913  | 1         | NM_00071   |            | 1512        | Calcium vd | CCDS4478  | OTTHUMG |
|           |                  |           |            |            |             |            |           |         |
| XM_048104 | ENSG00002740331  | 2         | NM_00201   | 1350 863   | S100 fusec  |            | CCDS3086  | OTTHUMG |
| AF264750  | ENSG000010819331 |           |            | 88 1399 48 | PHD finger  |            | CCDS5931  | OTTHUMG |
| AB058761  | ENSG000011347906 | NG_01223  |            | 28         | Zinc finger |            | CCDS4554  | OTTHUMG |
|           | ENSG00001505215  | NM_00522  |            | 1096       | Erb-b2 rec  |            | CCDS5514  | OTTHUMG |

|           |                                      |         |             |           |         |
|-----------|--------------------------------------|---------|-------------|-----------|---------|
| J05200    | ENSG00001862346,16621918             | 287 694 | Ryanodine   | CCDS3301  | OTTHUMG |
| AJ002535  | ENSG000011448995,NM_05284:555 722 59 |         | Fibronectin | CCDS1570  | OTTHUMG |
| AY356402  | ENSG000015003449,NM_02458:           | 24      | Cadherin re | CCDS3732  | OTTHUMG |
| AB058761  | ENSG00001505215,NM_00522:            | 1096    | Erb-b2 rec  | CCDS5514  | OTTHUMG |
| AF307851  | ENSG000011347906,NG_01223:           | 28      | Zinc finger | CCDS4554  | OTTHUMG |
| AF414442  | ENSG00006396087,3NM_000546           |         |             | CCDS1111  | OTTHUMG |
|           | 11369781,NM_02469:                   | 648     | Mucins      | CCDS54212 |         |
|           | ENSG00001505215,NM_00522:            | 1096    | Erb-b2 rec  | CCDS5514  | OTTHUMG |
|           | ENSG00001505215,NM_00522:            | 1096    | Erb-b2 rec  | CCDS5514  | OTTHUMG |
| AF307851  | ENSG00006396087,3NM_000546           |         |             | CCDS1111  | OTTHUMG |
| X83957    | ENSG000010051637,NM_004543           |         |             | CCDS4642  | OTTHUMG |
| X90568    | ENSG00002129545,1NM_13337:555 593 59 |         | Fibronectin | CCDS5442  | OTTHUMG |
| X90568    | ENSG00002129545,1NM_13337:555 593 59 |         | Fibronectin | CCDS5442  | OTTHUMG |
| X90568    | ENSG00002129545,1NM_13337:555 593 59 |         | Fibronectin | CCDS5442  | OTTHUMG |
| X90568    | ENSG00002129545,1NM_13337:555 593 59 |         | Fibronectin | CCDS5442  | OTTHUMG |
| AB018339  | ENSG00009872452,1NM_18296:           | 1252    | Spectrin re | CCDS5235  | OTTHUMG |
| AB018339  | ENSG00009872452,1NM_18296:           | 1252    | Spectrin re | CCDS5235  | OTTHUMG |
| BC019095  | ENSG000016288218,NM_13881:           | 1299    | BCH doma    | CCDS4798  | OTTHUMG |
| AB007862  | ENSG00008812505,9NM_006031           |         |             | CCDS3359  | OTTHUMG |
| XM_048104 | ENSG00002740331,2NM_00201:1350 863   |         | S100 fusec  | CCDS3086  | OTTHUMG |
| X83957    | ENSG000010051637,NM_004543           |         |             | CCDS4642  | OTTHUMG |
| X90568    | ENSG00002129545,1NM_13337:555 593 59 |         | Fibronectin | CCDS5442  | OTTHUMG |
| AY356402  | ENSG000015003449,NM_02458:           | 24      | Cadherin re | CCDS3732  | OTTHUMG |
|           | ENSG00001505215,NM_00522:            | 1096    | Erb-b2 rec  | CCDS5514  | OTTHUMG |
| AB018339  | ENSG00009872452,1NM_18296:           | 1252    | Spectrin re | CCDS5235  | OTTHUMG |
| U53204    | ENSG00008633055,8NM_00044:           | 939     | Plakins     | CCDS4376  | OTTHUMG |
| BC019095  | ENSG000016288218,NM_13881:           | 1299    | BCH doma    | CCDS4798  | OTTHUMG |
| AB058761  | ENSG000011347906,NG_01223:           | 28      | Zinc finger | CCDS4554  | OTTHUMG |
| J05200    | ENSG00001862346,16621918             | 287 694 | Ryanodine   | CCDS3301  | OTTHUMG |
| J03528    | ENSG00000197081,NM_00087:471 1233    |         | CD molecu   | CCDS5273  | OTTHUMG |
| AJ002535  | ENSG000011448995,NM_05284:555 722 59 |         | Fibronectin | CCDS1570  | OTTHUMG |
| X83957    | ENSG000010051637,NM_004543           |         |             | CCDS4642  | OTTHUMG |
| X90568    | ENSG00002129545,1NM_13337:555 593 59 |         | Fibronectin | CCDS5442  | OTTHUMG |
| U53204    | ENSG00008633055,8NM_00044:           | 939     | Plakins     | CCDS4376  | OTTHUMG |
| BC019095  | ENSG000016288218,NM_13881:           | 1299    | BCH doma    | CCDS4798  | OTTHUMG |
| AB126077  | ENSG000015144888,NM_02104:           | 619     | Keratin ass | CCDS4168  | OTTHUMG |
| AF414442  | ENSG000011369781,NM_02469:           | 648     | Mucins      | CCDS54212 |         |
| J05200    | ENSG00001862346,16621918             | 287 694 | Ryanodine   | CCDS3301  | OTTHUMG |
| XM_048104 | ENSG00002740331,2NM_00201:1350 863   |         | S100 fusec  | CCDS3086  | OTTHUMG |
| AJ002535  | ENSG000011448995,NM_05284:555 722 59 |         | Fibronectin | CCDS1570  | OTTHUMG |
| AJ002535  | ENSG000011448995,NM_05284:555 722 59 |         | Fibronectin | CCDS1570  | OTTHUMG |
| AJ002535  | ENSG000011448995,NM_05284:555 722 59 |         | Fibronectin | CCDS1570  | OTTHUMG |
| X83957    | ENSG000010051637,NM_004543           |         |             | CCDS4642  | OTTHUMG |
| X83957    | ENSG000010051637,NM_004543           |         |             | CCDS4642  | OTTHUMG |
| X90568    | ENSG00002129545,1NM_13337:555 593 59 |         | Fibronectin | CCDS5442  | OTTHUMG |
| X90568    | ENSG00002129545,1NM_13337:555 593 59 |         | Fibronectin | CCDS5442  | OTTHUMG |
| AY356402  | ENSG000015003449,NM_02458:           | 24      | Cadherin re | CCDS3732  | OTTHUMG |
| AB018339  | ENSG00009872452,1NM_18296:           | 1252    | Spectrin re | CCDS5235  | OTTHUMG |
| U53204    | ENSG00008633055,8NM_00044:           | 939     | Plakins     | CCDS4376  | OTTHUMG |
| BC019095  | ENSG000016288218,NM_13881:           | 1299    | BCH doma    | CCDS4798  | OTTHUMG |









|           |          |        |                    |      |                             |
|-----------|----------|--------|--------------------|------|-----------------------------|
| 605925    | NM_00131 | O95613 | ENSG000Guc002zji.4 |      | O43152 Q7Z7C9               |
| 605925    | NM_00131 | O95613 | ENSG000Guc002zji.4 |      | O43152 Q7Z7C9               |
| 601282    | NM_00044 | Q15149 | ENSG000Guc064rfy.1 | hg38 | Q15148 Q16640 Q6S376 Q6S377 |
| 000000575 | NM_02104 | O75690 | ENSG000Guc001oqr.1 |      | Q6L8G7 Q6UTX6               |
| 605925    | NM_00131 | O95613 | ENSG000Guc002zji.4 |      | O43152 Q7Z7C9               |
| 605925    | NM_00131 | O95613 | ENSG000Guc002zji.4 |      | O43152 Q7Z7C9               |
| 135940    | NM_00201 | P20930 | ENSG000Guc001ezu.1 |      | Q01720 Q5T583 Q9UC71        |
| 161650    | NM_00116 | P20929 | ENSG000Guc031rpp.1 | hg38 | F8WCL5 F8WCP0 Q15346 Q53Q   |
| 612411    | NM_00129 | Q6V017 | ENSG000Guc003ifj.5 |      | A8K5Z6 B5MDG4 Q3LIA6 Q8TCK  |
| 608441    | NM_03307 | Q8NF91 | ENSG000Guc003qou.4 |      | E7EQI5 O94890 Q5JV19 Q5JV22 |
| 147280    | NM_00087 | P11717 | ENSG000Guc003qta.4 |      | Q7Z7G9 Q96PT5               |
| 147280    | NM_00087 | P11717 | ENSG000Guc003qta.4 |      | Q7Z7G9 Q96PT5               |
| 131550    | NM_00522 | P00533 | ENSG000Guc003tqk.4 |      | O00688 O00732 P06268 Q14225 |
| 606833    | NM_17060 | Q8NEZ4 | ENSG00000055609    |      | Q8NC02 Q8NDF6 Q9H9P4 Q9NR   |
| 606833    | NM_17060 | Q8NEZ4 | ENSG00000055609    |      | Q8NC02 Q8NDF6 Q9H9P4 Q9NR   |
| 601282    | NM_00044 | Q15149 | ENSG000Guc064rfy.1 | hg38 | Q15148 Q16640 Q6S376 Q6S377 |
| 191170    | NM_00054 | P04637 | ENSG000Guc060aur.1 |      | Q15086 Q15087 Q15088 Q16535 |
|           |          |        |                    |      |                             |
|           |          |        |                    | hg38 |                             |
| 608616    | NM_00109 | Q5VST9 | ENSG000Guc001hsq.2 | hg38 | Q2A664 Q5T7G8 Q5T7G9 Q5VST9 |
| 188840    | NM_00125 | Q8WZ42 | ENSG000Guc031rqc.3 |      | A6NKB1 E7EQE6 E7ET18 K7EN   |
|           |          |        |                    |      |                             |
|           |          |        |                    |      |                             |
| 135940    | NM_00201 | P20930 | ENSG000Guc001ezu.1 |      | Q01720 Q5T583 Q9UC71        |
| 000000575 | NM_02104 | O75690 | ENSG000Guc001oqr.1 |      | Q6L8G7 Q6UTX6               |
|           |          |        |                    |      |                             |
| 135940    | NM_00201 | P20930 | ENSG000Guc001ezu.1 |      | Q01720 Q5T583 Q9UC71        |
| 601282    | NM_00044 | Q15149 | ENSG000Guc064rfy.1 |      | Q15148 Q16640 Q6S376 Q6S377 |
| 188840    | NM_00125 | Q8WZ42 | ENSG000Guc031rqc.3 |      | A6NKB1 E7EQE6 E7ET18 K7EN   |
| 606833    | NM_17060 | Q8NEZ4 | ENSG00000055609    |      | Q8NC02 Q8NDF6 Q9H9P4 Q9NR   |
| 000000575 | NM_02104 | O75690 | ENSG000Guc001oqr.1 |      | Q6L8G7 Q6UTX6               |
| 191170    | NM_00054 | P04637 | ENSG000Guc060aur.1 |      | Q15086 Q15087 Q15088 Q16535 |
| 191170    | NM_00054 | P04637 | ENSG000Guc060aur.1 |      | Q15086 Q15087 Q15088 Q16535 |
| 180901    | NM_00054 | P21817 | ENSG000Guc002oit.4 |      | Q16314 Q16368 Q9NPK1 Q9P1U  |
| 610691    | NM_00130 | Q8WUY3 | ENSG000Guc010mpk.1 | hg38 | B3KYC4 B4DQH8 O15073 Q58A6  |
| 000000575 | NM_02104 | O75690 | ENSG000Guc001oqr.1 |      | Q6L8G7 Q6UTX6               |
| 606154    | NM_02469 | Q8WXI7 | ENSG000Guc002mkp.3 |      | Q6ZQW5 Q96RK2               |
| 135940    | NM_00201 | P20930 | ENSG000Guc001ezu.1 |      | Q01720 Q5T583 Q9UC71        |
| 608616    | NM_00109 | Q5VST9 | ENSG000Guc001hsq.2 | hg38 | Q2A664 Q5T7G8 Q5T7G9 Q5VST9 |
| 104155    | NM_00116 | Q15911 | ENSG000Guc002fck.4 |      | D3DWS8 O15101 Q13719        |
|           |          |        |                    |      |                             |
| 000000575 | NM_02104 | O75690 | ENSG000Guc001oqr.1 |      | Q6L8G7 Q6UTX6               |
| 104155    | NM_00116 | Q15911 | ENSG000Guc002fck.4 |      | D3DWS8 O15101 Q13719        |
| 135940    | NM_00201 | P20930 | ENSG000Guc001ezu.1 |      | Q01720 Q5T583 Q9UC71        |
| 191170    | NM_00054 | P04637 | ENSG000Guc060aur.1 |      | Q15086 Q15087 Q15088 Q16535 |
| 191170    | NM_00054 | P04637 | ENSG000Guc060aur.1 |      | Q15086 Q15087 Q15088 Q16535 |
| 131550    | NM_00522 | P00533 | ENSG000Guc003tqk.4 |      | O00688 O00732 P06268 Q14225 |
| 188840    | NM_00125 | Q8WZ42 | ENSG000Guc031rqc.3 |      | A6NKB1 E7EQE6 E7ET18 K7EN   |
| 131550    | NM_00522 | P00533 | ENSG000Guc003tqk.4 |      | O00688 O00732 P06268 Q14225 |
| 131550    | NM_00522 | P00533 | ENSG000Guc003tqk.4 | hg38 | O00688 O00732 P06268 Q14225 |
| 000000575 | NM_02104 | O75690 | ENSG000Guc001oqr.1 |      | Q6L8G7 Q6UTX6               |
| 114205    | NM_00071 | Q13936 | ENSG000Guc001qkl.3 |      | B2RUT3 E9PDJ0 Q13917 Q13918 |
|           |          |        |                    |      |                             |
| 135940    | NM_00201 | P20930 | ENSG000Guc001ezu.1 |      | Q01720 Q5T583 Q9UC71        |
| 606833    | NM_17060 | Q8NEZ4 | ENSG00000055609    |      | Q8NC02 Q8NDF6 Q9H9P4 Q9NR   |
| 612078    | NM_00112 | Q96JG9 | ENSG000Guc002fku.2 | hg38 |                             |
| 131550    | NM_00522 | P00533 | ENSG000Guc003tqk.4 | hg38 | O00688 O00732 P06268 Q14225 |

|           |          |        |                    |      |                             |
|-----------|----------|--------|--------------------|------|-----------------------------|
| 180901    | NM_00054 | P21817 | ENSG000Guc002oit.4 | hg38 | Q16314 Q16368 Q9NPK1 Q9P1U  |
| 608616    | NM_00109 | Q5VST9 | ENSG000Guc001hsq.2 |      | Q2A664 Q5T7G8 Q5T7G9 Q5VST9 |
| 612411    | NM_00129 | Q6V017 | ENSG000Guc003ifj.5 |      | A8K5Z6 B5MDG4 Q3LIA6 Q8TCK  |
| 131550    | NM_00522 | P00533 | ENSG000Guc003tqk.4 | hg38 | O00688 O00732 P06268 Q14225 |
| 612078    | NM_00112 | Q96JG9 | ENSG000Guc002fku.2 | hg38 |                             |
| 191170    | NM_00054 | P04637 | ENSG000Guc060aur.1 |      | Q15086 Q15087 Q15088 Q16535 |
| 606154    | NM_02469 | Q8WXI7 | ENSG000Guc002mkp.3 |      | Q6ZQW5 Q96RK2               |
| 131550    | NM_00522 | P00533 | ENSG000Guc003tqk.4 |      | O00688 O00732 P06268 Q14225 |
| 131550    | NM_00522 | P00533 | ENSG000Guc003tqk.4 |      | O00688 O00732 P06268 Q14225 |
| 191170    | NM_00054 | P04637 | ENSG000Guc060aur.1 |      | Q15086 Q15087 Q15088 Q16535 |
| 161650    | NM_00116 | P20929 | ENSG000Guc031rpp.1 |      | F8WCL5 F8WCP0 Q15346 Q53Q   |
| 188840    | NM_00125 | Q8WZ42 | ENSG000Guc031rqc.3 |      | A6NKB1 E7EQE6 E7ET18 K7ENY  |
| 188840    | NM_00125 | Q8WZ42 | ENSG000Guc031rqc.3 |      | A6NKB1 E7EQE6 E7ET18 K7ENY  |
| 188840    | NM_00125 | Q8WZ42 | ENSG000Guc031rqc.3 |      | A6NKB1 E7EQE6 E7ET18 K7ENY  |
| 188840    | NM_00125 | Q8WZ42 | ENSG000Guc031rqc.3 |      | A6NKB1 E7EQE6 E7ET18 K7ENY  |
| 608441    | NM_03307 | Q8NF91 | ENSG000Guc003qou.4 |      | E7EQI5 O94890 Q5JV19 Q5JV22 |
| 608441    | NM_03307 | Q8NF91 | ENSG000Guc003qou.4 |      | E7EQI5 O94890 Q5JV19 Q5JV22 |
| 610691    | NM_00130 | Q8WUY3 | ENSG000Guc010mpk.4 |      | B3KYC4 B4DQH8 O15073 Q58A6  |
| 605925    | NM_00131 | O95613 | ENSG000Guc002zji.4 |      | O43152 Q7Z7C9               |
| 135940    | NM_00201 | P20930 | ENSG000Guc001ezu.1 |      | Q01720 Q5T583 Q9UC71        |
| 161650    | NM_00116 | P20929 | ENSG000Guc031rpp.1 |      | F8WCL5 F8WCP0 Q15346 Q53Q   |
| 188840    | NM_00125 | Q8WZ42 | ENSG000Guc031rqc.3 |      | A6NKB1 E7EQE6 E7ET18 K7ENY  |
| 612411    | NM_00129 | Q6V017 | ENSG000Guc003ifj.5 |      | A8K5Z6 B5MDG4 Q3LIA6 Q8TCK  |
| 131550    | NM_00522 | P00533 | ENSG000Guc003tqk.4 | hg38 | O00688 O00732 P06268 Q14225 |
| 608441    | NM_03307 | Q8NF91 | ENSG000Guc003qou.4 |      | E7EQI5 O94890 Q5JV19 Q5JV22 |
| 601282    | NM_00044 | Q15149 | ENSG000Guc064rfy.1 | hg38 | Q15148 Q16640 Q6S376 Q6S377 |
| 610691    | NM_00130 | Q8WUY3 | ENSG000Guc010mpk.4 |      | B3KYC4 B4DQH8 O15073 Q58A6  |
| 612078    | NM_00112 | Q96JG9 | ENSG000Guc002fku.2 | hg38 |                             |
| 180901    | NM_00054 | P21817 | ENSG000Guc002oit.4 |      | Q16314 Q16368 Q9NPK1 Q9P1U  |
| 147280    | NM_00087 | P11717 | ENSG000Guc003qta.4 |      | Q7Z7G9 Q96PT5               |
|           |          |        | hg38               |      |                             |
| 608616    | NM_00109 | Q5VST9 | ENSG000Guc001hsq.2 |      | Q2A664 Q5T7G8 Q5T7G9 Q5VST9 |
| 161650    | NM_00116 | P20929 | ENSG000Guc031rpp.1 |      | F8WCL5 F8WCP0 Q15346 Q53Q   |
| 188840    | NM_00125 | Q8WZ42 | ENSG000Guc031rqc.3 |      | A6NKB1 E7EQE6 E7ET18 K7ENY  |
| 601282    | NM_00044 | Q15149 | ENSG000Guc064rfy.1 |      | Q15148 Q16640 Q6S376 Q6S377 |
| 610691    | NM_00130 | Q8WUY3 | ENSG000Guc010mpk.4 |      | B3KYC4 B4DQH8 O15073 Q58A6  |
| 000000575 | NM_02104 | O75690 | ENSG000Guc001oqr.1 |      | Q6L8G7 Q6UTX6               |
| 606154    | NM_02469 | Q8WXI7 | ENSG000Guc002mkp.3 |      | Q6ZQW5 Q96RK2               |
| 180901    | NM_00054 | P21817 | ENSG000Guc002oit.4 | hg38 | Q16314 Q16368 Q9NPK1 Q9P1U  |
| 135940    | NM_00201 | P20930 | ENSG000Guc001ezu.1 |      | Q01720 Q5T583 Q9UC71        |
| 608616    | NM_00109 | Q5VST9 | ENSG000Guc001hsq.2 | hg38 | Q2A664 Q5T7G8 Q5T7G9 Q5VST9 |
| 608616    | NM_00109 | Q5VST9 | ENSG000Guc001hsq.2 | hg38 | Q2A664 Q5T7G8 Q5T7G9 Q5VST9 |
| 608616    | NM_00109 | Q5VST9 | ENSG000Guc001hsq.2 | hg38 | Q2A664 Q5T7G8 Q5T7G9 Q5VST9 |
| 161650    | NM_00116 | P20929 | ENSG000Guc031rpp.1 |      | F8WCL5 F8WCP0 Q15346 Q53Q   |
| 161650    | NM_00116 | P20929 | ENSG000Guc031rpp.1 |      | F8WCL5 F8WCP0 Q15346 Q53Q   |
| 188840    | NM_00125 | Q8WZ42 | ENSG000Guc031rqc.3 |      | A6NKB1 E7EQE6 E7ET18 K7ENY  |
| 188840    | NM_00125 | Q8WZ42 | ENSG000Guc031rqc.3 |      | A6NKB1 E7EQE6 E7ET18 K7ENY  |
| 612411    | NM_00129 | Q6V017 | ENSG000Guc003ifj.5 | hg38 | A8K5Z6 B5MDG4 Q3LIA6 Q8TCK  |
| 608441    | NM_03307 | Q8NF91 | ENSG000Guc003qou.4 |      | E7EQI5 O94890 Q5JV19 Q5JV22 |
| 601282    | NM_00044 | Q15149 | ENSG000Guc064rfy.1 | hg38 | Q15148 Q16640 Q6S376 Q6S377 |
| 610691    | NM_00130 | Q8WUY3 | ENSG000Guc010mpk.4 | hg38 | B3KYC4 B4DQH8 O15073 Q58A6  |





|        |          |          |          |          |          |          |          |          |          |          |        |
|--------|----------|----------|----------|----------|----------|----------|----------|----------|----------|----------|--------|
| chr1_a | bechr1_a | bechr1_b | bechr1_b | bechr1_b |        |
| 71     | Q10465   | Q10466   | Q15598   | Q2XUS3   | Q32Q60   | Q4U1Z6   | Q4ZG20   | Q6NSG0   | Q6PDB1   | Q6PJP0   | Q7KYM2 |
| 3      | Q13919   | Q13920   | Q13921   | Q13922   | Q13923   | Q13924   | Q13925   | Q13926   | Q13927   | Q13928   | Q13929 |
| Q16807 | Q16808   | Q16809   | Q16810   | Q16811   | Q16848   | Q2XN98   | Q3LRW1   | Q3LRW2   | Q3LRW3   | Q3LRW4   | Q3     |
| Q68GS5 | Q92795   | Q9BZS2   | Q9GZX1   | Q9H2C9   | Q9H3C9   | Q9UMD7   | Q9UMD8   | Q9UMG5   |          |          |        |
| Q16807 | Q16808   | Q16809   | Q16810   | Q16811   | Q16848   | Q2XN98   | Q3LRW1   | Q3LRW2   | Q3LRW3   | Q3LRW4   | Q3     |
| 71     | Q10465   | Q10466   | Q15598   | Q2XUS3   | Q32Q60   | Q4U1Z6   | Q4ZG20   | Q6NSG0   | Q6PDB1   | Q6PJP0   | Q7KYM2 |
| 71     | Q10465   | Q10466   | Q15598   | Q2XUS3   | Q32Q60   | Q4U1Z6   | Q4ZG20   | Q6NSG0   | Q6PDB1   | Q6PJP0   | Q7KYM2 |
| 71     | Q10465   | Q10466   | Q15598   | Q2XUS3   | Q32Q60   | Q4U1Z6   | Q4ZG20   | Q6NSG0   | Q6PDB1   | Q6PJP0   | Q7KYM2 |
| Q8N9P7 | Q8TCP1   | Q8WWW6   | Q8WWW7   | Q8WXF6   | Q96N17   | Q9C0A7   | Q9H525   | Q9H526   | Q9NS36   | Q9NU8    |        |
|        | Q6S378   | Q6S379   | Q6S380   | Q6S381   | Q6S382   | Q6S383   |          |          |          |          |        |
| 3      | Q13919   | Q13920   | Q13921   | Q13922   | Q13923   | Q13924   | Q13925   | Q13926   | Q13927   | Q13928   | Q13929 |
| Q16807 | Q16808   | Q16809   | Q16810   | Q16811   | Q16848   | Q2XN98   | Q3LRW1   | Q3LRW2   | Q3LRW3   | Q3LRW4   | Q3     |
| Q2     | Q53TG8   |          |          |          |          |          |          |          |          |          |        |
| Q2     | Q53TG8   |          |          |          |          |          |          |          |          |          |        |
| Q68GS5 | Q92795   | Q9BZS2   | Q9GZX1   | Q9H2C9   | Q9H3C9   | Q9UMD7   | Q9UMD8   | Q9UMG5   |          |          |        |
| 13     | Q9P222   | Q9UDR7   |          |          |          |          |          |          |          |          |        |
| Q16807 | Q16808   | Q16809   | Q16810   | Q16811   | Q16848   | Q2XN98   | Q3LRW1   | Q3LRW2   | Q3LRW3   | Q3LRW4   | Q3     |
| J2     | Q86YC7   | Q8NHN0   | Q8NHN1   | Q8NHN2   | Q8NHN3   | Q8NHN4   | Q8NHN5   | Q8NHN6   | Q8NHN7   | Q8NHN8   | Q8N    |
| 71     | Q10465   | Q10466   | Q15598   | Q2XUS3   | Q32Q60   | Q4U1Z6   | Q4ZG20   | Q6NSG0   | Q6PDB1   | Q6PJP0   | Q7KYM2 |
| 7      | Q9H5T6   |          |          |          |          |          |          |          |          |          |        |
|        | Q6S378   | Q6S379   | Q6S380   | Q6S381   | Q6S382   | Q6S383   |          |          |          |          |        |
|        | Q6S378   | Q6S379   | Q6S380   | Q6S381   | Q6S382   | Q6S383   |          |          |          |          |        |

|Q6S378|Q6S379|Q6S380|Q6S381|Q6S382|Q6S383

Q2|Q53TG8

7|Q9H5T6

|Q8N9P7|Q8TCP1|Q8WWW6|Q8WWW7|Q8WXF6|Q96N17|Q9C0A7|Q9H525|Q9H526|Q9NS36|Q9NU

Q68GS5|Q92795|Q9BZS2|Q9GZX1|Q9H2C9|Q9H3C9|Q9UMD7|Q9UMD8|Q9UMG5

13|Q9P222|Q9UDR7

13|Q9P222|Q9UDR7

|Q6S378|Q6S379|Q6S380|Q6S381|Q6S382|Q6S383

Q16807|Q16808|Q16809|Q16810|Q16811|Q16848|Q2XN98|Q3LRW1|Q3LRW2|Q3LRW3|Q3LRW4|Q3

|2|Q86YC7|Q8NHN0|Q8NHN1|Q8NHN2|Q8NHN3|Q8NHN4|Q8NHN5|Q8NHN6|Q8NHN7|Q8NHN8|Q8N

71|Q10465|Q10466|Q15598|Q2XUS3|Q32Q60|Q4U1Z6|Q4ZG20|Q6NSG0|Q6PDB1|Q6PJP0|Q7KYM2|

|Q6S378|Q6S379|Q6S380|Q6S381|Q6S382|Q6S383

71|Q10465|Q10466|Q15598|Q2XUS3|Q32Q60|Q4U1Z6|Q4ZG20|Q6NSG0|Q6PDB1|Q6PJP0|Q7KYM2|

13|Q9P222|Q9UDR7

Q16807|Q16808|Q16809|Q16810|Q16811|Q16848|Q2XN98|Q3LRW1|Q3LRW2|Q3LRW3|Q3LRW4|Q3

Q16807|Q16808|Q16809|Q16810|Q16811|Q16848|Q2XN98|Q3LRW1|Q3LRW2|Q3LRW3|Q3LRW4|Q3

4

|3|Q5JUB6|Q5T304|Q5T476|Q6T2V6|Q6T2V7|Q8N665

|2|Q86YC7|Q8NHN0|Q8NHN1|Q8NHN2|Q8NHN3|Q8NHN4|Q8NHN5|Q8NHN6|Q8NHN7|Q8NHN8|Q8N

Q16807|Q16808|Q16809|Q16810|Q16811|Q16848|Q2XN98|Q3LRW1|Q3LRW2|Q3LRW3|Q3LRW4|Q3

Q16807|Q16808|Q16809|Q16810|Q16811|Q16848|Q2XN98|Q3LRW1|Q3LRW2|Q3LRW3|Q3LRW4|Q3

Q68GS5|Q92795|Q9BZS2|Q9GZX1|Q9H2C9|Q9H3C9|Q9UMD7|Q9UMD8|Q9UMG5

71|Q10465|Q10466|Q15598|Q2XUS3|Q32Q60|Q4U1Z6|Q4ZG20|Q6NSG0|Q6PDB1|Q6PJP0|Q7KYM2|

Q68GS5|Q92795|Q9BZS2|Q9GZX1|Q9H2C9|Q9H3C9|Q9UMD7|Q9UMD8|Q9UMG5

Q68GS5|Q92795|Q9BZS2|Q9GZX1|Q9H2C9|Q9H3C9|Q9UMD7|Q9UMD8|Q9UMG5

3|Q13919|Q13920|Q13921|Q13922|Q13923|Q13924|Q13925|Q13926|Q13927|Q13928|Q13929|Q13930

13|Q9P222|Q9UDR7

Q68GS5|Q92795|Q9BZS2|Q9GZX1|Q9H2C9|Q9H3C9|Q9UMD7|Q9UMD8|Q9UMG5

4

J2|Q86YC7|Q8NHN0|Q8NHN1|Q8NHN2|Q8NHN3|Q8NHN4|Q8NHN5|Q8NHN6|Q8NHN7|Q8NHN8|Q8N7|Q9H5T6

Q68GS5|Q92795|Q9BZS2|Q9GZX1|Q9H2C9|Q9H3C9|Q9UMD7|Q9UMD8|Q9UMG5

Q16807|Q16808|Q16809|Q16810|Q16811|Q16848|Q2XN98|Q3LRW1|Q3LRW2|Q3LRW3|Q3LRW4|Q3

Q68GS5|Q92795|Q9BZS2|Q9GZX1|Q9H2C9|Q9H3C9|Q9UMD7|Q9UMD8|Q9UMG5

Q68GS5|Q92795|Q9BZS2|Q9GZX1|Q9H2C9|Q9H3C9|Q9UMD7|Q9UMD8|Q9UMG5

Q16807|Q16808|Q16809|Q16810|Q16811|Q16848|Q2XN98|Q3LRW1|Q3LRW2|Q3LRW3|Q3LRW4|Q3Q2|Q53TG8

/1|Q10465|Q10466|Q15598|Q2XUS3|Q32Q60|Q4U1Z6|Q4ZG20|Q6NSG0|Q6PDB1|Q6PJP0|Q7KYM2|Q

/1|Q10465|Q10466|Q15598|Q2XUS3|Q32Q60|Q4U1Z6|Q4ZG20|Q6NSG0|Q6PDB1|Q6PJP0|Q7KYM2|Q

/1|Q10465|Q10466|Q15598|Q2XUS3|Q32Q60|Q4U1Z6|Q4ZG20|Q6NSG0|Q6PDB1|Q6PJP0|Q7KYM2|Q

/1|Q10465|Q10466|Q15598|Q2XUS3|Q32Q60|Q4U1Z6|Q4ZG20|Q6NSG0|Q6PDB1|Q6PJP0|Q7KYM2|Q

Q8N9P7|Q8TCP1|Q8WWW6|Q8WWW7|Q8WXF6|Q96N17|Q9C0A7|Q9H525|Q9H526|Q9NS36|Q9NU

Q8N9P7|Q8TCP1|Q8WWW6|Q8WWW7|Q8WXF6|Q96N17|Q9C0A7|Q9H525|Q9H526|Q9NS36|Q9NU

3|Q5JUB6|Q5T304|Q5T476|Q6T2V6|Q6T2V7|Q8N665

Q2|Q53TG8

/1|Q10465|Q10466|Q15598|Q2XUS3|Q32Q60|Q4U1Z6|Q4ZG20|Q6NSG0|Q6PDB1|Q6PJP0|Q7KYM2|Q7|Q9H5T6

Q68GS5|Q92795|Q9BZS2|Q9GZX1|Q9H2C9|Q9H3C9|Q9UMD7|Q9UMD8|Q9UMG5

Q8N9P7|Q8TCP1|Q8WWW6|Q8WWW7|Q8WXF6|Q96N17|Q9C0A7|Q9H525|Q9H526|Q9NS36|Q9NU

|Q6S378|Q6S379|Q6S380|Q6S381|Q6S382|Q6S383

3|Q5JUB6|Q5T304|Q5T476|Q6T2V6|Q6T2V7|Q8N665

4

J2|Q86YC7|Q8NHN0|Q8NHN1|Q8NHN2|Q8NHN3|Q8NHN4|Q8NHN5|Q8NHN6|Q8NHN7|Q8NHN8|Q8N

Q2|Q53TG8

/1|Q10465|Q10466|Q15598|Q2XUS3|Q32Q60|Q4U1Z6|Q4ZG20|Q6NSG0|Q6PDB1|Q6PJP0|Q7KYM2|Q

|Q6S378|Q6S379|Q6S380|Q6S381|Q6S382|Q6S383

3|Q5JUB6|Q5T304|Q5T476|Q6T2V6|Q6T2V7|Q8N665

4

J2|Q86YC7|Q8NHN0|Q8NHN1|Q8NHN2|Q8NHN3|Q8NHN4|Q8NHN5|Q8NHN6|Q8NHN7|Q8NHN8|Q8N

J2|Q86YC7|Q8NHN0|Q8NHN1|Q8NHN2|Q8NHN3|Q8NHN4|Q8NHN5|Q8NHN6|Q8NHN7|Q8NHN8|Q8N

J2|Q86YC7|Q8NHN0|Q8NHN1|Q8NHN2|Q8NHN3|Q8NHN4|Q8NHN5|Q8NHN6|Q8NHN7|Q8NHN8|Q8N

Q2|Q53TG8

Q2|Q53TG8

/1|Q10465|Q10466|Q15598|Q2XUS3|Q32Q60|Q4U1Z6|Q4ZG20|Q6NSG0|Q6PDB1|Q6PJP0|Q7KYM2|Q

/1|Q10465|Q10466|Q15598|Q2XUS3|Q32Q60|Q4U1Z6|Q4ZG20|Q6NSG0|Q6PDB1|Q6PJP0|Q7KYM2|Q

7|Q9H5T6

Q8N9P7|Q8TCP1|Q8WWW6|Q8WWW7|Q8WXF6|Q96N17|Q9C0A7|Q9H525|Q9H526|Q9NS36|Q9NU

|Q6S378|Q6S379|Q6S380|Q6S381|Q6S382|Q6S383

3|Q5JUB6|Q5T304|Q5T476|Q6T2V6|Q6T2V7|Q8N665

4

71|Q10465|Q10466|Q15598|Q2XUS3|Q32Q60|Q4U1Z6|Q4ZG20|Q6NSG0|Q6PDB1|Q6PJP0|Q7KYM2|  
13|Q9P222|Q9UDR7  
13|Q9P222|Q9UDR7

4

71|Q10465|Q10466|Q15598|Q2XUS3|Q32Q60|Q4U1Z6|Q4ZG20|Q6NSG0|Q6PDB1|Q6PJP0|Q7KYM2|  
71|Q10465|Q10466|Q15598|Q2XUS3|Q32Q60|Q4U1Z6|Q4ZG20|Q6NSG0|Q6PDB1|Q6PJP0|Q7KYM2|  
3|Q5JUB6|Q5T304|Q5T476|Q6T2V6|Q6T2V7|Q8N665

Q8N9P7|Q8TCP1|Q8WWW6|Q8WWW7|Q8WXF6|Q96N17|Q9C0A7|Q9H525|Q9H526|Q9NS36|Q9NU5  
13|Q9P222|Q9UDR7

Q16807|Q16808|Q16809|Q16810|Q16811|Q16848|Q2XN98|Q3LRW1|Q3LRW2|Q3LRW3|Q3LRW4|Q3

4

Q16807|Q16808|Q16809|Q16810|Q16811|Q16848|Q2XN98|Q3LRW1|Q3LRW2|Q3LRW3|Q3LRW4|Q3  
13|Q9P222|Q9UDR7



13|Q9P222|Q9UDR7

Q2|Q53TG8

/1|Q10465|Q10466|Q15598|Q2XUS3|Q32Q60|Q4U1Z6|Q4ZG20|Q6NSG0|Q6PDB1|Q6PJP0|Q7KYM2|

/1|Q10465|Q10466|Q15598|Q2XUS3|Q32Q60|Q4U1Z6|Q4ZG20|Q6NSG0|Q6PDB1|Q6PJP0|Q7KYM2|

/1|Q10465|Q10466|Q15598|Q2XUS3|Q32Q60|Q4U1Z6|Q4ZG20|Q6NSG0|Q6PDB1|Q6PJP0|Q7KYM2|

7|Q9H5T6

|Q8N9P7|Q8TCP1|Q8WWW6|Q8WWW7|Q8WXF6|Q96N17|Q9C0A7|Q9H525|Q9H526|Q9NS36|Q9NU

Q68GS5|Q92795|Q9BZS2|Q9GZX1|Q9H2C9|Q9H3C9|Q9UMD7|Q9UMD8|Q9UMG5





|                                                              |  |  |  |  |  |  |  |  |  |       |       |
|--------------------------------------------------------------|--|--|--|--|--|--|--|--|--|-------|-------|
|                                                              |  |  |  |  |  |  |  |  |  | FALSE | FALSE |
| HN9 Q96AA2 Q9HCD3 Q9HCL6                                     |  |  |  |  |  |  |  |  |  | FALSE | FALSE |
|                                                              |  |  |  |  |  |  |  |  |  | FALSE | FALSE |
|                                                              |  |  |  |  |  |  |  |  |  | FALSE | FALSE |
|                                                              |  |  |  |  |  |  |  |  |  | FALSE | FALSE |
| LRW5 Q86UG1 Q8J016 Q99659 Q9BTM4 Q9HAQ8 Q9NP68 Q9NPJ2 Q9NZD0 |  |  |  |  |  |  |  |  |  | FALSE | FALSE |
|                                                              |  |  |  |  |  |  |  |  |  | FALSE | FALSE |
|                                                              |  |  |  |  |  |  |  |  |  | FALSE | FALSE |
|                                                              |  |  |  |  |  |  |  |  |  | FALSE | FALSE |
| LRW5 Q86UG1 Q8J016 Q99659 Q9BTM4 Q9HAQ8 Q9NP68 Q9NPJ2 Q9NZD0 |  |  |  |  |  |  |  |  |  | FALSE | FALSE |
|                                                              |  |  |  |  |  |  |  |  |  | FALSE | FALSE |
| Q7KYN4 Q7KYN5 Q7LDM3 Q7Z2X3 Q8TCG8 Q8WZ42 Q8WZ51 Q8WZ52 Q8W  |  |  |  |  |  |  |  |  |  | FALSE | FALSE |
| Q7KYN4 Q7KYN5 Q7LDM3 Q7Z2X3 Q8TCG8 Q8WZ42 Q8WZ51 Q8WZ52 Q8W  |  |  |  |  |  |  |  |  |  | FALSE | FALSE |
| Q7KYN4 Q7KYN5 Q7LDM3 Q7Z2X3 Q8TCG8 Q8WZ42 Q8WZ51 Q8WZ52 Q8W  |  |  |  |  |  |  |  |  |  | FALSE | FALSE |
| Q7KYN4 Q7KYN5 Q7LDM3 Q7Z2X3 Q8TCG8 Q8WZ42 Q8WZ51 Q8WZ52 Q8W  |  |  |  |  |  |  |  |  |  | FALSE | FALSE |
| 50 Q9UJ06 Q9UJ07 Q9ULF8                                      |  |  |  |  |  |  |  |  |  | FALSE | FALSE |
| 50 Q9UJ06 Q9UJ07 Q9ULF8                                      |  |  |  |  |  |  |  |  |  | FALSE | FALSE |
|                                                              |  |  |  |  |  |  |  |  |  | FALSE | FALSE |
|                                                              |  |  |  |  |  |  |  |  |  | FALSE | FALSE |
|                                                              |  |  |  |  |  |  |  |  |  | FALSE | FALSE |
|                                                              |  |  |  |  |  |  |  |  |  | FALSE | FALSE |
|                                                              |  |  |  |  |  |  |  |  |  | FALSE | FALSE |
| Q7KYN4 Q7KYN5 Q7LDM3 Q7Z2X3 Q8TCG8 Q8WZ42 Q8WZ51 Q8WZ52 Q8W  |  |  |  |  |  |  |  |  |  | FALSE | FALSE |
|                                                              |  |  |  |  |  |  |  |  |  | FALSE | FALSE |
|                                                              |  |  |  |  |  |  |  |  |  | FALSE | FALSE |
| 50 Q9UJ06 Q9UJ07 Q9ULF8                                      |  |  |  |  |  |  |  |  |  | FALSE | FALSE |
|                                                              |  |  |  |  |  |  |  |  |  | FALSE | FALSE |
|                                                              |  |  |  |  |  |  |  |  |  | FALSE | FALSE |
|                                                              |  |  |  |  |  |  |  |  |  | FALSE | FALSE |
|                                                              |  |  |  |  |  |  |  |  |  | FALSE | FALSE |
|                                                              |  |  |  |  |  |  |  |  |  | FALSE | FALSE |
|                                                              |  |  |  |  |  |  |  |  |  | FALSE | FALSE |
|                                                              |  |  |  |  |  |  |  |  |  | FALSE | FALSE |
|                                                              |  |  |  |  |  |  |  |  |  | FALSE | FALSE |
|                                                              |  |  |  |  |  |  |  |  |  | FALSE | FALSE |
|                                                              |  |  |  |  |  |  |  |  |  | FALSE | FALSE |
|                                                              |  |  |  |  |  |  |  |  |  | FALSE | FALSE |
|                                                              |  |  |  |  |  |  |  |  |  | FALSE | FALSE |
|                                                              |  |  |  |  |  |  |  |  |  | FALSE | FALSE |
| HN9 Q96AA2 Q9HCD3 Q9HCL6                                     |  |  |  |  |  |  |  |  |  | FALSE | FALSE |
|                                                              |  |  |  |  |  |  |  |  |  | FALSE | FALSE |
| Q7KYN4 Q7KYN5 Q7LDM3 Q7Z2X3 Q8TCG8 Q8WZ42 Q8WZ51 Q8WZ52 Q8W  |  |  |  |  |  |  |  |  |  | FALSE | FALSE |
|                                                              |  |  |  |  |  |  |  |  |  | FALSE | FALSE |
|                                                              |  |  |  |  |  |  |  |  |  | FALSE | FALSE |
|                                                              |  |  |  |  |  |  |  |  |  | FALSE | FALSE |
|                                                              |  |  |  |  |  |  |  |  |  | FALSE | FALSE |
|                                                              |  |  |  |  |  |  |  |  |  | FALSE | FALSE |
|                                                              |  |  |  |  |  |  |  |  |  | FALSE | FALSE |
|                                                              |  |  |  |  |  |  |  |  |  | FALSE | FALSE |
|                                                              |  |  |  |  |  |  |  |  |  | FALSE | FALSE |
|                                                              |  |  |  |  |  |  |  |  |  | FALSE | FALSE |
|                                                              |  |  |  |  |  |  |  |  |  | FALSE | FALSE |
| HN9 Q96AA2 Q9HCD3 Q9HCL6                                     |  |  |  |  |  |  |  |  |  | FALSE | FALSE |
| HN9 Q96AA2 Q9HCD3 Q9HCL6                                     |  |  |  |  |  |  |  |  |  | FALSE | FALSE |
| HN9 Q96AA2 Q9HCD3 Q9HCL6                                     |  |  |  |  |  |  |  |  |  | FALSE | FALSE |
|                                                              |  |  |  |  |  |  |  |  |  | FALSE | FALSE |
|                                                              |  |  |  |  |  |  |  |  |  | FALSE | FALSE |
| Q7KYN4 Q7KYN5 Q7LDM3 Q7Z2X3 Q8TCG8 Q8WZ42 Q8WZ51 Q8WZ52 Q8W  |  |  |  |  |  |  |  |  |  | FALSE | FALSE |
| Q7KYN4 Q7KYN5 Q7LDM3 Q7Z2X3 Q8TCG8 Q8WZ42 Q8WZ51 Q8WZ52 Q8W  |  |  |  |  |  |  |  |  |  | FALSE | FALSE |
|                                                              |  |  |  |  |  |  |  |  |  | FALSE | FALSE |
| 50 Q9UJ06 Q9UJ07 Q9ULF8                                      |  |  |  |  |  |  |  |  |  | FALSE | FALSE |
|                                                              |  |  |  |  |  |  |  |  |  | FALSE | FALSE |
|                                                              |  |  |  |  |  |  |  |  |  | FALSE | FALSE |
|                                                              |  |  |  |  |  |  |  |  |  | FALSE | FALSE |



















































| dbSNP_U3 | dbSNP_U5 | dbSNP_VC | dbSNP_VF | dbSNP_W | dbSNP_W | dbSNP_db | HGNC_Ent | dbSNP_RS |
|----------|----------|----------|----------|---------|---------|----------|----------|----------|
| FALSE    | FALSE    |          |          |         | FALSE   |          | 7273     |          |
| FALSE    | FALSE    |          |          |         | FALSE   |          | 57830    |          |
| FALSE    | FALSE    |          |          |         | FALSE   |          | 775      |          |
| FALSE    | FALSE    |          |          |         | FALSE   |          | 7157     |          |
| FALSE    | FALSE    |          |          |         | FALSE   |          | 94025    |          |
| FALSE    | FALSE    |          |          |         | FALSE   |          |          |          |
| FALSE    | FALSE    |          |          |         | FALSE   |          |          |          |
| FALSE    | FALSE    |          |          |         | FALSE   |          |          |          |
| FALSE    | FALSE    |          |          |         | FALSE   |          |          |          |
| FALSE    | FALSE    |          |          |         | FALSE   |          |          |          |
| FALSE    | FALSE    |          |          |         | FALSE   |          |          |          |
| FALSE    | FALSE    |          |          |         | FALSE   |          |          |          |
| FALSE    | FALSE    |          |          |         | FALSE   |          |          |          |
| FALSE    | FALSE    |          |          |         | FALSE   |          |          |          |
| FALSE    | FALSE    |          |          |         | FALSE   |          |          |          |
| FALSE    | FALSE    |          |          |         | FALSE   |          |          |          |
| FALSE    | FALSE    |          |          |         | FALSE   |          |          |          |
| FALSE    | FALSE    |          |          |         | FALSE   |          |          |          |
| FALSE    | FALSE    |          |          |         | FALSE   |          |          |          |
| FALSE    | FALSE    |          |          |         | FALSE   |          |          |          |
| FALSE    | FALSE    |          |          |         | FALSE   |          |          |          |
| FALSE    | FALSE    |          |          |         | FALSE   |          |          |          |
| FALSE    | FALSE    |          |          |         | FALSE   |          |          |          |
| FALSE    | FALSE    |          |          |         | FALSE   |          |          |          |
| FALSE    | FALSE    |          |          |         | FALSE   |          |          |          |
| FALSE    | FALSE    |          |          |         | FALSE   |          |          |          |
| FALSE    | FALSE    |          |          |         | FALSE   |          |          |          |
| FALSE    | FALSE    |          |          |         | FALSE   |          | 1956     |          |
| FALSE    | FALSE    |          |          |         | FALSE   |          | 7157     |          |
| FALSE    | FALSE    |          |          |         | FALSE   |          | 94025    |          |
| FALSE    | FALSE    |          |          |         | FALSE   |          |          |          |
| FALSE    | FALSE    |          |          |         | FALSE   |          |          |          |
| FALSE    | FALSE    |          |          |         | FALSE   |          | 7273     |          |
| FALSE    | FALSE    |          |          |         | FALSE   |          | 7273     |          |
| FALSE    | FALSE    |          |          |         | FALSE   |          | 7273     |          |
| FALSE    | FALSE    |          |          |         | FALSE   |          | 23345    |          |
| FALSE    | FALSE    |          |          |         | FALSE   |          | 5339     |          |
| FALSE    | FALSE    |          |          |         | FALSE   |          | 775      |          |
| FALSE    | FALSE    |          |          |         | FALSE   |          |          |          |
| FALSE    | FALSE    |          |          |         | FALSE   |          | 7157     |          |
| FALSE    | FALSE    |          |          |         | FALSE   |          | 4703     |          |
| FALSE    | FALSE    |          |          |         | FALSE   |          | 4703     |          |
| FALSE    | FALSE    |          |          |         | FALSE   |          | 1956     |          |
| FALSE    | FALSE    |          |          |         | FALSE   |          | 58508    |          |
| FALSE    | FALSE    |          |          |         | FALSE   |          | 463      |          |
| FALSE    | FALSE    |          |          |         | FALSE   |          | 7157     |          |
| FALSE    | FALSE    |          |          |         | FALSE   |          | 94025    |          |
| FALSE    | FALSE    |          |          |         | FALSE   |          | 5116     |          |
| FALSE    | FALSE    |          |          |         | FALSE   |          | 2312     |          |
| FALSE    | FALSE    |          |          |         | FALSE   |          | 84033    |          |
| FALSE    | FALSE    |          |          |         | FALSE   |          | 7273     |          |
| FALSE    | FALSE    |          |          |         | FALSE   |          | 79633    |          |
| FALSE    | FALSE    |          |          |         | FALSE   |          | 5339     |          |
| FALSE    | FALSE    |          |          |         | FALSE   |          | 5339     |          |
| FALSE    | FALSE    |          |          |         | FALSE   |          | 57830    |          |
| FALSE    | FALSE    |          |          |         | FALSE   |          |          |          |

|       |       |  |  |       |        |
|-------|-------|--|--|-------|--------|
| FALSE | FALSE |  |  | FALSE | 5116   |
| FALSE | FALSE |  |  | FALSE | 5116   |
| FALSE | FALSE |  |  | FALSE | 5339   |
| FALSE | FALSE |  |  | FALSE | 57830  |
| FALSE | FALSE |  |  | FALSE | 5116   |
| FALSE | FALSE |  |  | FALSE | 5116   |
| FALSE | FALSE |  |  | FALSE | 2312   |
| FALSE | FALSE |  |  | FALSE | 4703   |
| FALSE | FALSE |  |  | FALSE | 79633  |
| FALSE | FALSE |  |  | FALSE | 23345  |
| FALSE | FALSE |  |  | FALSE | 3482   |
| FALSE | FALSE |  |  | FALSE | 3482   |
| FALSE | FALSE |  |  | FALSE | 1956   |
| FALSE | FALSE |  |  | FALSE | 58508  |
| FALSE | FALSE |  |  | FALSE | 58508  |
| FALSE | FALSE |  |  | FALSE | 5339   |
| FALSE | FALSE |  |  | FALSE | 7157   |
| FALSE | FALSE |  |  | FALSE |        |
| FALSE | FALSE |  |  | FALSE |        |
| FALSE | FALSE |  |  | FALSE |        |
| FALSE | FALSE |  |  | FALSE |        |
| FALSE | FALSE |  |  | FALSE | 84033  |
| FALSE | FALSE |  |  | FALSE | 7273   |
| FALSE | FALSE |  |  | FALSE |        |
| FALSE | FALSE |  |  | FALSE |        |
| FALSE | FALSE |  |  | FALSE |        |
| FALSE | FALSE |  |  | FALSE | 2312   |
| FALSE | FALSE |  |  | FALSE | 57830  |
| FALSE | FALSE |  |  | FALSE |        |
| FALSE | FALSE |  |  | FALSE | 2312   |
| FALSE | FALSE |  |  | FALSE | 5339   |
| FALSE | FALSE |  |  | FALSE | 7273   |
| FALSE | FALSE |  |  | FALSE | 58508  |
| FALSE | FALSE |  |  | FALSE | 57830  |
| FALSE | FALSE |  |  | FALSE | 7157   |
| FALSE | FALSE |  |  | FALSE | 7157   |
| FALSE | FALSE |  |  | FALSE | 6261   |
| FALSE | FALSE |  |  | FALSE | 158471 |
| FALSE | FALSE |  |  | FALSE | 57830  |
| FALSE | FALSE |  |  | FALSE | 94025  |
| FALSE | FALSE |  |  | FALSE | 2312   |
| FALSE | FALSE |  |  | FALSE | 84033  |
| FALSE | FALSE |  |  | FALSE | 463    |
| FALSE | FALSE |  |  | FALSE |        |
| FALSE | FALSE |  |  | FALSE | 57830  |
| FALSE | FALSE |  |  | FALSE | 463    |
| FALSE | FALSE |  |  | FALSE | 2312   |
| FALSE | FALSE |  |  | FALSE | 7157   |
| FALSE | FALSE |  |  | FALSE | 7157   |
| FALSE | FALSE |  |  | FALSE | 1956   |
| FALSE | FALSE |  |  | FALSE | 7273   |
| FALSE | FALSE |  |  | FALSE | 1956   |
| FALSE | FALSE |  |  | FALSE | 1956   |
| FALSE | FALSE |  |  | FALSE | 57830  |
| FALSE | FALSE |  |  | FALSE | 775    |
| FALSE | FALSE |  |  | FALSE |        |
| FALSE | FALSE |  |  | FALSE | 2312   |
| FALSE | FALSE |  |  | FALSE | 58508  |
| FALSE | FALSE |  |  | FALSE | 84627  |
| FALSE | FALSE |  |  | FALSE | 1956   |

|       |       |  |  |       |        |
|-------|-------|--|--|-------|--------|
| FALSE | FALSE |  |  | FALSE | 6261   |
| FALSE | FALSE |  |  | FALSE | 84033  |
| FALSE | FALSE |  |  | FALSE | 79633  |
| FALSE | FALSE |  |  | FALSE | 1956   |
| FALSE | FALSE |  |  | FALSE | 84627  |
| FALSE | FALSE |  |  | FALSE | 7157   |
| FALSE | FALSE |  |  | FALSE | 94025  |
| FALSE | FALSE |  |  | FALSE | 1956   |
| FALSE | FALSE |  |  | FALSE | 1956   |
| FALSE | FALSE |  |  | FALSE | 7157   |
| FALSE | FALSE |  |  | FALSE | 4703   |
| FALSE | FALSE |  |  | FALSE | 7273   |
| FALSE | FALSE |  |  | FALSE | 7273   |
| FALSE | FALSE |  |  | FALSE | 7273   |
| FALSE | FALSE |  |  | FALSE | 7273   |
| FALSE | FALSE |  |  | FALSE | 23345  |
| FALSE | FALSE |  |  | FALSE | 23345  |
| FALSE | FALSE |  |  | FALSE | 158471 |
| FALSE | FALSE |  |  | FALSE |        |
| FALSE | FALSE |  |  | FALSE | 5116   |
| FALSE | FALSE |  |  | FALSE | 2312   |
| FALSE | FALSE |  |  | FALSE | 4703   |
| FALSE | FALSE |  |  | FALSE | 7273   |
| FALSE | FALSE |  |  | FALSE | 79633  |
| FALSE | FALSE |  |  | FALSE | 1956   |
| FALSE | FALSE |  |  | FALSE | 23345  |
| FALSE | FALSE |  |  | FALSE | 5339   |
| FALSE | FALSE |  |  | FALSE | 158471 |
| FALSE | FALSE |  |  | FALSE | 84627  |
| FALSE | FALSE |  |  | FALSE | 6261   |
| FALSE | FALSE |  |  | FALSE |        |
| FALSE | FALSE |  |  | FALSE |        |
| FALSE | FALSE |  |  | FALSE | 3482   |
| FALSE | FALSE |  |  | FALSE |        |
| FALSE | FALSE |  |  | FALSE |        |
| FALSE | FALSE |  |  | FALSE |        |
| FALSE | FALSE |  |  | FALSE |        |
| FALSE | FALSE |  |  | FALSE |        |
| FALSE | FALSE |  |  | FALSE |        |
| FALSE | FALSE |  |  | FALSE |        |
| FALSE | FALSE |  |  | FALSE | 84033  |
| FALSE | FALSE |  |  | FALSE | 4703   |
| FALSE | FALSE |  |  | FALSE | 7273   |
| FALSE | FALSE |  |  | FALSE | 5339   |
| FALSE | FALSE |  |  | FALSE | 158471 |
| FALSE | FALSE |  |  | FALSE | 57830  |
| FALSE | FALSE |  |  | FALSE | 94025  |
| FALSE | FALSE |  |  | FALSE | 6261   |
| FALSE | FALSE |  |  | FALSE | 2312   |
| FALSE | FALSE |  |  | FALSE | 84033  |
| FALSE | FALSE |  |  | FALSE | 84033  |
| FALSE | FALSE |  |  | FALSE | 84033  |
| FALSE | FALSE |  |  | FALSE | 4703   |
| FALSE | FALSE |  |  | FALSE | 4703   |
| FALSE | FALSE |  |  | FALSE | 7273   |
| FALSE | FALSE |  |  | FALSE | 7273   |
| FALSE | FALSE |  |  | FALSE | 79633  |
| FALSE | FALSE |  |  | FALSE | 23345  |
| FALSE | FALSE |  |  | FALSE | 5339   |
| FALSE | FALSE |  |  | FALSE | 158471 |





| dbSNP_VLDP | ECNT | NLOD | RPA   | RU     | STR | id   |      |
|------------|------|------|-------|--------|-----|------|------|
| FALSE      | 945  | 1    | 37.23 |        |     | pt2  |      |
| FALSE      | 2105 | 1    | 59.05 |        |     | pt2  |      |
| FALSE      | 1280 | 2    | 35.47 |        |     | pt2  |      |
| FALSE      | 760  | 1    | 41.48 |        |     | pt2  |      |
| FALSE      | 539  | 1    | 20.97 |        |     | pt2  |      |
| FALSE      | 1044 | 2    | 88.75 |        |     | pt3  |      |
| FALSE      | 381  | 1    | 25.88 |        |     | pt3  |      |
| FALSE      | 573  | 2    | 40.92 |        |     | pt3  |      |
| FALSE      | 421  | 1    | 39.13 |        |     | pt3  |      |
| FALSE      | 255  | 1    | 13.85 |        |     | pt3  |      |
| FALSE      | 614  | 2    | 30.61 |        |     | pt3  |      |
| FALSE      | 619  | 2    | 33.36 |        |     | pt3  |      |
| FALSE      | 222  | 2    | 23.78 |        |     | pt3  |      |
| FALSE      | 259  | 2    | 27.99 |        |     | pt3  |      |
| FALSE      | 405  | 1    | 29.45 |        |     | pt3  |      |
| FALSE      | 670  | 1    | 41.34 |        |     | pt4  |      |
| FALSE      | 474  | 1    | 22.73 |        |     | pt4  |      |
| FALSE      | 307  | 1    | 9.63  |        |     | pt4  |      |
| FALSE      | 395  | 1    | 20.97 |        |     | pt4  |      |
| FALSE      | 625  | 1    | 29.15 |        |     | pt5  |      |
| FALSE      | 339  | 2    | 14.15 |        |     | pt5  |      |
| FALSE      | 806  | 1    | 25.88 |        |     | pt5  |      |
| FALSE      | 714  | 1    | 29.41 |        |     | pt5  |      |
| FALSE      | 817  | 1    | 34.62 |        |     | pt5  |      |
| FALSE      | 866  | 2    | 25.88 |        |     | pt5  |      |
| FALSE      | 922  | 1    | 38.83 |        |     | pt5  |      |
| FALSE      | 70   | 1    | 3.61  |        |     | pt5  |      |
| FALSE      | 446  | 2    | 16.5  |        |     | pt5  |      |
| FALSE      | 605  | 2    | 24.96 |        |     | pt7  |      |
| FALSE      | 908  | 1    | 23.68 |        |     | pt9  |      |
| FALSE      | 467  | 1    | 25.49 |        |     | pt9  |      |
| FALSE      | 978  | 1    | 49.57 |        |     | pt9  |      |
| FALSE      | 280  | 2    | 16.25 |        |     | pt10 |      |
| FALSE      | 280  | 2    | 17.76 |        |     | pt10 |      |
| FALSE      | 524  | 1    | 19.26 |        |     | pt11 |      |
| FALSE      | 991  | 1    | 24.52 |        |     | pt11 |      |
| FALSE      | 524  | 1    | 30.96 |        |     | pt11 |      |
| FALSE      | 642  | 1    | 16.25 |        |     | pt11 |      |
| FALSE      | 602  | 1    | 24.94 |        |     | pt11 |      |
| FALSE      | 1015 | 1    | 38.44 |        |     | pt11 |      |
| FALSE      | 226  | 2    | 16.25 |        |     | pt11 |      |
| FALSE      | 501  | 1    | 20.42 |        |     | pt11 |      |
| FALSE      | 672  | 2    | 21.35 | [2, 1] | GC  | TRUE | pt12 |
| FALSE      | 659  | 2    | 21.36 |        |     |      | pt12 |
| FALSE      | 930  | 1    | 16.21 |        |     |      | pt12 |
| FALSE      | 754  | 1    | 37.22 |        |     |      | pt12 |
| FALSE      | 1226 | 1    | 41.51 | [4, 2] | C   | TRUE | pt12 |
| FALSE      | 609  | 1    | 21.67 |        |     |      | pt12 |
| FALSE      | 492  | 1    | 27.69 |        |     |      | pt12 |
| FALSE      | 294  | 1    | 12.91 |        |     |      | pt12 |
| FALSE      | 1114 | 1    | 43.6  |        |     |      | pt13 |
| FALSE      | 517  | 1    | 20.76 |        |     |      | pt13 |
| FALSE      | 837  | 1    | 32.76 |        |     |      | pt13 |
| FALSE      | 353  | 1    | 10.23 |        |     |      | pt13 |
| FALSE      | 2120 | 2    | 69.17 |        |     |      | pt13 |
| FALSE      | 2090 | 2    | 69.19 |        |     |      | pt13 |
| FALSE      | 856  | 1    | 35.16 |        |     |      | pt13 |
| FALSE      | 252  | 2    | 20.08 |        |     |      | pt13 |



|       |      |   |        |        |   |      |      |
|-------|------|---|--------|--------|---|------|------|
| FALSE | 728  | 2 | 25.48  |        |   |      | pt13 |
| FALSE | 724  | 2 | 24.73  |        |   |      | pt13 |
| FALSE | 162  | 1 | 7.78   |        |   |      | pt14 |
| FALSE | 1912 | 1 | 55.13  |        |   |      | pt14 |
| FALSE | 199  | 2 | 13.24  |        |   |      | pt14 |
| FALSE | 195  | 2 | 13.24  |        |   |      | pt14 |
| FALSE | 3279 | 1 | 90     |        |   |      | pt15 |
| FALSE | 234  | 1 | 11.42  |        |   |      | pt15 |
| FALSE | 514  | 1 | 13.85  |        |   |      | pt15 |
| FALSE | 782  | 1 | 25.49  |        |   |      | pt15 |
| FALSE | 68   | 1 | 6.62   |        |   |      | pt15 |
| FALSE | 150  | 1 | 8.68   |        |   |      | pt15 |
| FALSE | 536  | 1 | 22.27  |        |   |      | pt15 |
| FALSE | 345  | 2 | 23.73  |        |   |      | pt15 |
| FALSE | 483  | 2 | 25.75  |        |   |      | pt15 |
| FALSE | 273  | 2 | 13.5   |        |   |      | pt15 |
| FALSE | 556  | 1 | 21.58  |        |   |      | pt15 |
| FALSE | 310  | 1 | 17.05  |        |   |      | pt16 |
| FALSE | 179  | 2 | 17.16  |        |   |      | pt16 |
| FALSE | 257  | 2 | 19.22  |        |   |      | pt16 |
| FALSE | 413  | 1 | 19.56  |        |   |      | pt16 |
| FALSE | 752  | 2 | 16.48  |        |   |      | pt17 |
| FALSE | 253  | 1 | 19.25  |        |   |      | pt17 |
| FALSE | 140  | 2 | 16.56  |        |   |      | pt18 |
| FALSE | 147  | 2 | 14.75  |        |   |      | pt18 |
| FALSE | 281  | 1 | 17.15  |        |   |      | pt18 |
| FALSE | 1023 | 1 | 51.83  |        |   |      | pt19 |
| FALSE | 1751 | 1 | 57.74  |        |   |      | pt19 |
| FALSE | 224  | 2 | 19.57  |        |   |      | pt19 |
| FALSE | 985  | 2 | 19.86  |        |   |      | pt20 |
| FALSE | 407  | 1 | 15.35  |        |   |      | pt20 |
| FALSE | 396  | 1 | 25.75  |        |   |      | pt21 |
| FALSE | 487  | 1 | 24.23  |        |   |      | pt21 |
| FALSE | 1305 | 1 | 54.35  |        |   |      | pt21 |
| FALSE | 460  | 1 | 20.47  |        |   |      | pt21 |
| FALSE | 408  | 1 | 19.29  | [3, 5] | C | TRUE | pt21 |
| FALSE | 731  | 1 | 21.61  |        |   |      | pt21 |
| FALSE | 616  | 1 | 27.39  |        |   |      | pt22 |
| FALSE | 2130 | 1 | 41.28  |        |   |      | pt22 |
| FALSE | 861  | 1 | 36.41  |        |   |      | pt22 |
| FALSE | 2043 | 1 | 139.98 |        |   |      | pt23 |
| FALSE | 327  | 2 | 16.24  |        |   |      | pt23 |
| FALSE | 1145 | 2 | 64.11  |        |   |      | pt23 |
| FALSE | 184  | 2 | 19.87  |        |   |      | pt25 |
| FALSE | 2208 | 2 | 76.8   |        |   |      | pt26 |
| FALSE | 443  | 1 | 21.97  |        |   |      | pt26 |
| FALSE | 1212 | 1 | 68.14  |        |   |      | pt28 |
| FALSE | 712  | 2 | 35.52  |        |   |      | pt28 |
| FALSE | 708  | 2 | 35.49  |        |   |      | pt28 |
| FALSE | 694  | 1 | 15.15  |        |   |      | pt29 |
| FALSE | 442  | 1 | 17.46  |        |   |      | pt30 |
| FALSE | 675  | 1 | 13.18  |        |   |      | pt30 |
| FALSE | 564  | 1 | 15.65  |        |   |      | pt30 |
| FALSE | 2429 | 1 | 58.87  |        |   |      | pt30 |
| FALSE | 471  | 1 | 9.88   |        |   |      | pt30 |
| FALSE | 302  | 2 | 19.87  |        |   |      | pt30 |
| FALSE | 1427 | 1 | 60.81  |        |   |      | pt31 |
| FALSE | 119  | 1 | 6.28   |        |   |      | pt31 |
| FALSE | 795  | 2 | 24.67  |        |   |      | pt31 |
| FALSE | 445  | 1 | 18.96  |        |   |      | pt32 |

|       |      |   |       |        |     |      |      |
|-------|------|---|-------|--------|-----|------|------|
| FALSE | 586  | 1 | 36.64 | [2, 1] | GCA | TRUE | pt32 |
| FALSE | 936  | 1 | 40.52 |        |     |      | pt33 |
| FALSE | 183  | 1 | 11.99 |        |     |      | pt33 |
| FALSE | 546  | 1 | 10.23 |        |     |      | pt33 |
| FALSE | 305  | 1 | 21.02 |        |     |      | pt33 |
| FALSE | 439  | 1 | 20.97 |        |     |      | pt33 |
| FALSE | 468  | 1 | 24.03 |        |     |      | pt33 |
| FALSE | 441  | 2 | 12.04 |        |     |      | pt34 |
| FALSE | 467  | 2 | 12.34 |        |     |      | pt34 |
| FALSE | 333  | 1 | 17.16 |        |     |      | pt34 |
| FALSE | 295  | 1 | 35.33 |        |     |      | pt35 |
| FALSE | 270  | 1 | 34.91 |        |     |      | pt35 |
| FALSE | 256  | 1 | 33.06 |        |     |      | pt35 |
| FALSE | 332  | 2 | 36.53 |        |     |      | pt35 |
| FALSE | 350  | 2 | 37.93 |        |     |      | pt35 |
| FALSE | 164  | 2 | 18.82 |        |     |      | pt35 |
| FALSE | 181  | 2 | 19.22 |        |     |      | pt35 |
| FALSE | 246  | 1 | 25.23 |        |     |      | pt35 |
| FALSE | 176  | 2 | 22.88 |        |     |      | pt35 |
| FALSE | 76   | 1 | 8.68  |        |     |      | pt35 |
| FALSE | 1102 | 1 | 59.44 |        |     |      | pt36 |
| FALSE | 265  | 1 | 25.23 | [6, 7] | T   | TRUE | pt36 |
| FALSE | 544  | 1 | 43.55 |        |     |      | pt36 |
| FALSE | 615  | 1 | 51.13 |        |     |      | pt36 |
| FALSE | 325  | 1 | 21.97 |        |     |      | pt36 |
| FALSE | 568  | 1 | 30.4  |        |     |      | pt38 |
| FALSE | 519  | 1 | 44.37 |        |     |      | pt38 |
| FALSE | 386  | 1 | 18.84 |        |     |      | pt38 |
| FALSE | 430  | 1 | 44.46 |        |     |      | pt38 |
| FALSE | 268  | 1 | 23.46 |        |     |      | pt38 |
| FALSE | 226  | 1 | 50.73 |        |     |      | pt39 |
| FALSE | 178  | 1 | 23.18 |        |     |      | pt39 |
| FALSE | 205  | 1 | 12.2  |        |     |      | pt42 |
| FALSE | 497  | 1 | 34.87 |        |     |      | pt43 |
| FALSE | 451  | 1 | 33.32 |        |     |      | pt43 |
| FALSE | 360  | 1 | 28.54 |        |     |      | pt43 |
| FALSE | 876  | 1 | 27.39 |        |     |      | pt44 |
| FALSE | 1231 | 1 | 45.41 |        |     |      | pt44 |
| FALSE | 894  | 1 | 50.22 |        |     |      | pt44 |
| FALSE | 219  | 1 | 10.23 |        |     |      | pt44 |
| FALSE | 41   | 1 | 3.01  |        |     |      | pt45 |
| FALSE | 247  | 1 | 17.76 |        |     |      | pt45 |
| FALSE | 370  | 1 | 31.55 |        |     |      | pt45 |
| FALSE | 256  | 1 | 15.05 |        |     |      | pt45 |
| FALSE | 449  | 2 | 35.9  |        |     |      | pt45 |
| FALSE | 538  | 1 | 46.07 |        |     |      | pt45 |
| FALSE | 600  | 1 | 49.09 |        |     |      | pt45 |
| FALSE | 250  | 2 | 19.56 |        |     |      | pt45 |
| FALSE | 742  | 2 | 54.02 |        |     |      | pt46 |
| FALSE | 847  | 2 | 56.89 |        |     |      | pt46 |
| FALSE | 600  | 2 | 40.47 |        |     |      | pt46 |
| FALSE | 277  | 1 | 21.99 |        |     |      | pt46 |
| FALSE | 1079 | 2 | 69.23 |        |     |      | pt46 |
| FALSE | 313  | 1 | 24.33 |        |     |      | pt46 |
| FALSE | 408  | 1 | 24.29 |        |     |      | pt46 |
| FALSE | 327  | 2 | 25.26 |        |     |      | pt46 |
| FALSE | 1104 | 2 | 85.82 |        |     |      | pt46 |
| FALSE | 284  | 1 | 20.01 |        |     |      | pt46 |
| FALSE | 310  | 2 | 16.8  |        |     |      | pt46 |
| FALSE | 334  | 1 | 19.86 |        |     |      | pt46 |

|       |      |   |       |        |   |      |      |
|-------|------|---|-------|--------|---|------|------|
| FALSE | 387  | 1 | 26.04 |        |   |      | pt46 |
| FALSE | 490  | 2 | 35.48 |        |   |      | pt46 |
| FALSE | 142  | 1 | 10.22 |        |   |      | pt46 |
| FALSE | 654  | 2 | 52.61 |        |   |      | pt46 |
| FALSE | 438  | 1 | 33.72 |        |   |      | pt46 |
| FALSE | 279  | 2 | 18.31 |        |   |      | pt46 |
| FALSE | 484  | 2 | 23.14 |        |   |      | pt47 |
| FALSE | 720  | 2 | 39.38 |        |   |      | pt47 |
| FALSE | 621  | 2 | 34.01 |        |   |      | pt47 |
| FALSE | 1080 | 1 | 59.25 |        |   |      | pt47 |
| FALSE | 443  | 1 | 21.97 |        |   |      | pt47 |
| FALSE | 383  | 1 | 25.28 |        |   |      | pt47 |
| FALSE | 558  | 2 | 31.09 |        |   |      | pt47 |
| FALSE | 542  | 1 | 25.1  |        |   |      | pt47 |
| FALSE | 1558 | 1 | 51.83 |        |   |      | pt48 |
| FALSE | 639  | 1 | 41.23 |        |   |      | pt48 |
| FALSE | 552  | 1 | 43.9  |        |   |      | pt48 |
| FALSE | 610  | 1 | 24.29 |        |   |      | pt48 |
| FALSE | 1020 | 1 | 25.58 |        |   |      | pt48 |
| FALSE | 562  | 2 | 26.19 |        |   |      | pt49 |
| FALSE | 167  | 2 | 10.84 |        |   |      | pt49 |
| FALSE | 173  | 2 | 20.47 |        |   |      | pt49 |
| FALSE | 827  | 1 | 49.31 |        |   |      | pt49 |
| FALSE | 671  | 1 | 46.47 |        |   |      | pt49 |
| FALSE | 1011 | 1 | 52.61 |        |   |      | pt49 |
| FALSE | 600  | 1 | 27.95 |        |   |      | pt49 |
| FALSE | 433  | 1 | 27.68 |        |   |      | pt50 |
| FALSE | 315  | 1 | 29.19 |        |   |      | pt50 |
| FALSE | 149  | 1 | 13.24 |        |   |      | pt50 |
| FALSE | 213  | 1 | 15.64 |        |   |      | pt50 |
| FALSE | 385  | 1 | 33.63 | [2, 1] | C | TRUE | pt50 |
| FALSE | 277  | 1 | 24.63 |        |   |      | pt50 |
| FALSE | 259  | 1 | 18.96 |        |   |      | pt50 |
| FALSE | 551  | 1 | 38.48 |        |   |      | pt50 |
| FALSE | 269  | 1 | 18.82 |        |   |      | pt50 |
| FALSE | 388  | 1 | 37.32 |        |   |      | pt50 |
| FALSE | 355  | 1 | 35.51 |        |   |      | pt50 |
| FALSE | 372  | 1 | 33.41 |        |   |      | pt50 |
| FALSE | 284  | 1 | 25.59 |        |   |      | pt50 |
| FALSE | 203  | 1 | 22.27 |        |   |      | pt50 |
| FALSE | 146  | 1 | 13.84 |        |   |      | pt50 |
| FALSE | 266  | 1 | 22.23 |        |   |      | pt50 |
| FALSE | 277  | 1 | 20.47 |        |   |      | pt50 |
| FALSE | 405  | 1 | 40.03 |        |   |      | pt50 |
| FALSE | 302  | 1 | 27.39 |        |   |      | pt50 |
| FALSE | 294  | 1 | 31    |        |   |      | pt50 |
| FALSE | 62   | 1 | 6.02  |        |   |      | pt50 |
| FALSE | 333  | 1 | 33.89 |        |   |      | pt50 |
| FALSE | 335  | 1 | 26.44 |        |   |      | pt50 |
| FALSE | 259  | 1 | 24.37 |        |   |      | pt50 |
| FALSE | 303  | 1 | 22.88 |        |   |      | pt50 |
| FALSE | 449  | 1 | 27.38 | [3, 4] | T | TRUE | pt50 |
| FALSE | 273  | 1 | 27    |        |   |      | pt51 |
| FALSE | 198  | 1 | 20.16 |        |   |      | pt51 |
| FALSE | 604  | 1 | 22.27 |        |   |      | pt52 |
| FALSE | 903  | 1 | 37.32 |        |   |      | pt52 |
| FALSE | 1345 | 1 | 55.27 |        |   |      | pt52 |
| FALSE | 428  | 1 | 13.86 |        |   |      | pt52 |
| FALSE | 147  | 1 | 30.08 |        |   |      | pt54 |
| FALSE | 76   | 1 | 14.45 |        |   |      | pt54 |

|       |      |   |        |  |  |      |
|-------|------|---|--------|--|--|------|
| FALSE | 296  | 2 | 8.13   |  |  | pt56 |
| FALSE | 1967 | 1 | 165.71 |  |  | pt57 |
| FALSE | 1756 | 1 | 118.9  |  |  | pt57 |
| FALSE | 282  | 1 | 21.06  |  |  | pt57 |
| FALSE | 716  | 1 | 67.56  |  |  | pt57 |
| FALSE | 504  | 2 | 43.3   |  |  | pt57 |
| FALSE | 498  | 2 | 35.27  |  |  | pt57 |
| FALSE | 434  | 1 | 46     |  |  | pt57 |
| FALSE | 329  | 1 | 36.67  |  |  | pt57 |
| FALSE | 415  | 1 | 54.44  |  |  | pt57 |
| FALSE | 274  | 1 | 22.23  |  |  | pt57 |
| FALSE | 379  | 1 | 57.19  |  |  | pt57 |
| FALSE | 355  | 1 | 29.62  |  |  | pt57 |
| FALSE | 278  | 1 | 24.68  |  |  | pt57 |
| FALSE | 717  | 1 | 60.17  |  |  | pt57 |
| FALSE | 419  | 1 | 24.08  |  |  | pt57 |
| FALSE | 551  | 1 | 44.55  |  |  | pt57 |
| FALSE | 291  | 1 | 34.43  |  |  | pt58 |
| FALSE | 111  | 1 | 15.05  |  |  | pt58 |
| FALSE | 135  | 1 | 8.68   |  |  | pt58 |
| FALSE | 193  | 1 | 8.43   |  |  | pt58 |
| FALSE | 359  | 1 | 40.03  |  |  | pt58 |
| FALSE | 186  | 1 | 13.24  |  |  | pt58 |
| FALSE | 204  | 2 | 15.97  |  |  | pt58 |
| FALSE | 309  | 2 | 17.22  |  |  | pt58 |
| FALSE | 237  | 1 | 21.58  |  |  | pt58 |
| FALSE | 477  | 2 | 18.3   |  |  | pt58 |
| FALSE | 105  | 2 | 9.63   |  |  | pt58 |
| FALSE | 295  | 1 | 28.9   |  |  | pt58 |
| FALSE | 292  | 1 | 25.89  |  |  | pt58 |
| FALSE | 233  | 1 | 7.52   |  |  | pt58 |
| FALSE | 68   | 1 | 6.62   |  |  | pt50 |
| FALSE | 150  | 1 | 8.68   |  |  | pt35 |
| FALSE | 150  | 1 | 8.68   |  |  | pt58 |
| FALSE | 150  | 1 | 8.68   |  |  | pt47 |
| FALSE | 150  | 1 | 8.68   |  |  | pt12 |
| FALSE | 150  | 1 | 8.68   |  |  | pt49 |
| FALSE | 150  | 1 | 8.68   |  |  | pt5  |
| FALSE | 150  | 1 | 8.68   |  |  | pt11 |
